# Supplementary material
Source: PubMed Central journal article supplement (PMC4521774)
Supplement: NIHMS652549-supplement-supplement_1.pdf [file NIHMS652549-supplement-supplement_1.pdf]

## **SUPPLEMENTARY DATA**

### **Supplementary FIGURES**

**Supplementary Figure 1.** NMF clusterings of mRNA expression data from 35 FLCs and their validation through the Affinity propagation clustering.

**Supplementary Figure 2.** FLC tumors over-expressed neuroendocrine markers and their integration in the FLC molecular classification.

**Supplementary Figure 3.** Heatmap representation of FLC chromosomal alterations and scheme of the DNAJB1-PRKACA fusion transcript.

**Supplementary Figure 4.** Somatic mutations found by WES and technical validation by TES and Sanger sequencing.

### **Supplementary FIGURES LEGENDS**

**Supplementary Figure 1.**

**Supplementary Figure 2.**

**Supplementary Figure 3.**

**Supplementary Figure 4.**

### **Supplementary MATERIALS and METHODS**

**Gene-expression microarray profiles**

**Immunohistochemistry**

**Genome-wide analysis of DNA copy number alteration**

**Validation of the DNAJB1-PRKACA fusion transcript**

**Whole-exome sequencing chromosomal rearrangements analysis**

**Whole-exome sequencing somatic mutation detection**

**Targeted-exome sequencing somatic mutation detection**

**Prognostic gene expression data analysis**

### **Supplementary REFERENCES**

### **Supplementary TABLES**

**Supplementary Table 1.** Clinicopathological characteristics of 72 FLC patients in the training and validation cohorts

**Supplementary Table 2.** Leave-one-out cross validation of FLC subclasses

**Supplementary Table 3.** FLC gene signature

**Supplementary Table 4.** FLC immunohistochemistry grading

**Supplementary Table 5.** Chromosomal arm-level genomic copy number alterations

**Supplementary Table 6.** Molecular profile of the broadly chromosomal altered samples

**Supplementary Table 7.** Focal amplifications in FLC samples

**Supplementary Table 8.** Focal deletions in FLC samples

**Supplementary Table 9.** Chromosomal arm-level genomic copy number alterations of the Fresh Frozen cohort

**Supplementary Table 10.** Summary of the damaging mutations found by WES

**Supplementary Table 11.** Mortality Index for the different prognostic group samples

**Supplementary Table 12.** Enrichment of selected gene signatures in 3 liver cancer cohorts (HCC, ICC and FLC) evaluated by NTP (FDR<0.05)

### **Supplementary FIGURES**

#### **Supplementary FIGURE LEGENDS**

**Supplementary Figure 1. A)** NMF consensus matrices depicting inter-sample correlation among 35 samples when 2 to 5 classes were assumed. Red color indicates highly robust co-clustering of samples. Plot of cophenetic correlation coefficient indicates that the most robust clustering is achieved when 3 classes are assumed in the dataset. **B)** Molecular classification validation by the Affinity propagation clustering represented by Principal component analysis (PCA), where PC1 means first principal component, and PC2 second principal component.

**Supplementary Figure 2. A)** Plot representation of neuroendocrine gene markers expression in FLC patients compared to non-tumoral samples by fold-change. FLC tumors present significant higher expression of VCAN. Vertical axis: gene expression of samples; Horizontal axis; FLC tissues (left) versus non-tumoral tissues (right). **B)** Integration of the neuroendocrine gene expression of FLC patients and non-tumoral tissues in the molecular classification, and their enrichment, when significant, in the FLC classes.

**Supplementary Figure 3. A)** Heatmap representation of FLC chromosomal alterations. Each tumor is displayed in separate columns, grouped by molecular class, and chromosome positions are indicated along the y axis. Chromosomal amplifications and deletions are represented in red and blue, respectively. **B)** Scheme of the DNAJB1-PRKACA fusion transcript

and example of the sanger sequencing result of the RT-PCR product from a FLC sample with the fusion transcript in the intersection point between the end of exon 1 of DNAJB1 and the start of exon 2 of PRKACA.

**Supplementary Figure 4. A)** Distribution of the mutations obtained using SIFT and PolyPhen2 algorithms as non-coding and coding, synonymous and non-synonymous, missense and nonsense, and finally among damaging, probably or possibly damaging and benign. **B)** Alignment visualization of TES results through Golden Helix Genome Browse software. **C)** Results of the technical validation of the damaging mutations found in *BRCA2* by Sanger sequencing.

### **Supplementary MATERIALS and METHODS**

#### **Gene-expression microarray profiles**

Total RNA was isolated from 4 freshly cut 5- $\mu$ m thick FFPE sections with the miRNA easy FFPE kit (Qiagen) using the semi-automated procedure QIAcube (Qiagen). To extract the tumoral and non-tumoral RNA, tissue sections were macrodissected in order to avoid contamination between liver tissues. Tissue macrodissection consists on defining areas representing tumoral and non-tumoral tissue by an H&E immunostaining, which is used as reference once obtaining specific tissue material in the FFPE slides with a blade. Quant-iT Ribogreen RNA assay kit (Invitrogen) was used to quantify the RNA. RNA quality was assessed by real-time quantitative reverse transcription PCR (qRT-PCR) using RPL13A Taq-Man probe (Applied Biosystems), cut-off Ct<28 cycles. Total RNA (250ng) was used for whole-genome gene-expression profiling by DASL array (Illumina). Poor quality mRNA expression profiles exhibiting outlier patterns were detected and removed as previously described<sup>1</sup>. Quality threshold was set based on %P-call (proportion of gene probes with a “present” signal) to ensure inter-sample similarity measured by Pearson correlation to “median” array defined as a vector of median signal intensity for each probe. We excluded 7 samples with a %P-call of <30%, resulting on 35 tumoral and 4 normal liver tissues. Raw data were normalized using cubic spline algorithm implemented in the Illumina Normalizer module of the GenePattern analysis Toolkit<sup>2,3</sup> and preprocessed using the PreprocessDataset module (GenePattern) with the following parameters: floor=100, fold change=3, ceiling=120.000 and min delta=100.

Non-negative matrix factorization (NMF) based consensus clustering method<sup>4</sup> was performed for the unsupervised clustering of the gene expression profiles, 2000 iterative

clustering of randomly bootstrapped samples to identify highly robust molecular classes were determined (NMFconsensus module, GenePattern).

Robustness of the obtained FLC molecular classification was evaluated in a conventional leave-one-out cross validation (LOOCV) procedure, where one sample at a time was held-out and a predictive model was trained using the rest of samples. Based on the model, the sample held-out was reclassified. This process was repeated for all 35 samples, and the error number was counted by k-nearest neighbor prediction method (KNNXValidation, modules, GenePattern).

To define robust FLC molecular classes gene signature not affected by outlier gene/sample, we employed the following LOOCV signature gene refinement procedure following the same process as explained above. Genes over-expressed in each subclass compared to the rest were identified by t-test with a significance threshold  $p < 0.00001$ . Genes selected as significant throughout the LOOCV procedure were included in the final list of signature genes. The analysis was performed by using custom R codes ([www.r-project.org](http://www.r-project.org)).

Validation of the number of molecular classes was performed using the independent method Affinity propagation clustering<sup>5</sup> that calculates the optimal number of clusters in which a set of samples can be divided. The input for the algorithm was the expression values of the genes which were able to differentiate two or more classes, described as those passing the Tukey Honestly Significant Difference *post hoc* test with a p-value  $< 0.01$  and absolute log<sub>2</sub> fold change  $> 2$ . The dispersion between samples and the cluster they belong to is represented graphically (**Suppl. Figure 1**) by calculating a Principal component analysis and plotting the first two components (PC1 and PC2).

Molecular pathways and gene expression signatures associated with classes were evaluated using Gene Set Enrichment Analysis (GSEA)<sup>6</sup> for Molecular Signature Database gene sets (MSigDB, [www.broadinstitute.org/msigdb](http://www.broadinstitute.org/msigdb))<sup>7</sup> and Nearest template prediction (NTP), both modules from GenePattern. The gene-expression signatures in liver cancer were previously reported<sup>8</sup>. Ingenuity<sup>®</sup> pathway analysis was also run for functional annotation.

## Immunohistochemistry

Immunohistochemical staining was performed in 3- $\mu$ m thick FFPE whole-section slides from 42 FLC tumours and the paired non-tumoral liver when available, after heat-induced antigen retrieval in microwave with sodium citrate (pH=6) or EDTA (pH=8) buffer. The primary antibodies and dilutions used were: rabbit EGFR (D38B1, Cell Signalling) 1:100, rabbit phospho-

RPS6 (Ser240/244) (Cell Signalling) 1:200, mouse HepPar1 (OCH1E5, Dako) ready to use, mouse Cytokeratin 7 (OV-TL 12/30, Dako) 1:50, mouse EpCAM (VU-1D9, Thermo Scientific) 1:100, and mouse Cytokeratin 19 (RCK108, Dako) 1:50. Immunoreactivity was independently graded by three liver expert pathologists (ST, LR, and SW) blinded to the expression profiling results. The variables measured were immunostaining intensity (score 0-3; 0: absent, 1: weak, 2: moderate and 3: strong), pattern (score 1-3; 1: few cells ( $\leq 1\%$ ), 2: focal ( $\leq 10\%$ ) and 3: diffuse), and localization of the staining (membranous, cytoplasmic or nuclear). Samples were defined positive for HepPar1, CK7 and when intensity of staining was 2 or higher, and focal or diffuse pattern, and for p-RPS6, CK19, EGFR and EpCAM by the presence of stained tumoral cells. Once patients were classified as positive or negative, Fisher exact test was performed to assess significance of the distribution between the molecular classes.

### **Genome-wide analysis of DNA copy number alteration**

Genomic DNA was isolated from 7 macrodissected 5- $\mu\text{m}$  thick FFPE sections with the QIAamp DNA FFPE Tissue Kit using QIAcube (Qiagen). To extract tumoral and non-tumoral DNA, tissue sections were macrodissected to avoid contamination between tissues. DNA quantity was assessed using Quant-It PicoGreen dsDNA Assay kit (Invitrogen) and DNA quality was determined by qRT-PCR of RNase P (Applied Biosystems), deltaCt defined as ct values(FFPE DNA) - Ct value (non-fragmented DNA), should not exceed a value of 4.

In order to depict the chromosomal alterations in FLC, copy number variations (CNVs) at over 715,000 genomic loci were analyzed in 32 primary tumors and 17 paired normal livers from FFPE samples. The frequency and magnitude of copy number gains and losses were evaluated in tumors using Genomic identification of significant targets in cancer (GISTIC) algorithm<sup>9</sup>. Genomic DNA (250 ng) of these 49 samples were assessed using Infinium FFPE restoration kit (Illumina) and HumanOmniExpress FFPE-12 v1.0 DNA Analysis BeadChip (Illumina).

This array provides optimized tag SNPs with high coverage of common variants in a genome-wide scale as well as high-resolution signals for DNA copy number. Two independent types of information, log R ratio (LRR) and B allele frequency (BAF), reported directly from GenomeStudio (Illumina) along with genotype calls at each SNP locus, were used for CNV analysis<sup>10</sup>. BAF values of tumor tissue can be transformed into the so called mirrored BAF (mBAF), by either taking advantage of paired normal tissue genotype or applying some pre-specified criteria as detailed<sup>11</sup>, providing better signal-to-noise ratio for segmentation in CNV

analysis than LRR, which are commonly used in other cancer studies. Circular binary segmentation (CBS)<sup>12,13</sup> is employed to partition tumor genome into segments with constant copy number based on mBAF. Within each segment, the median LRR values at all the SNP loci was taken as a surrogate measurement of the actual copy number, and used in genomic identification of significant targets in cancer (GISTIC) analysis, as implemented in the GISTIC2 package<sup>9</sup>. Broad and focal regions with recurrent copy number changes at relatively high frequency in the study cohort were detected, and the significance of such findings was evaluated through a permutation test. The reported regions are those with false discovery rate (FDR)<sup>14</sup> less than 0.25, and those genes within these regions were considered as candidates for further investigation. Focal aberrations are defined as frequently altered regions that affect less than half size of the chromosome arm where they are located, and broad alterations are those that affect more than half size of the chromosome. All genomic coordinates were annotated based on the hg19 assembly.

For the 23 FF FLC tissue samples, DNA was extracted as previously published<sup>15</sup>, and hybridized on the Infinium HumanHap370CNV Genotyping BeadChip SNP array. Data was extracted and evaluated as described above for the FFPE cohort.

Due to the small number of FF samples, GISTIC2 was not applicable to this dataset. Thus, we applied different criteria to define for each genomic segments the high confident events, such as allelic imbalance, gain and loss: 1) allelic imbalance= $mBAF_{median} > 0.6$  AND  $|LRR_{median}| < 0.5 * \sigma$ ; 2) gain= $mBAF_{median} > 0.57$  AND  $LRR_{median} > \sigma$ , and 3) loss:  $mBAF_{median} > 0.57$  AND  $LRR_{median} < -\sigma$ , where  $mBAF = |BAF - 0.5| + 0.5$  at heterozygous sites. The parameters used stand for  $mBAF_{median}$  the median of mBAF values at heterozygous sites within the segment;  $LRR_{median}$  the median of LRR values at all sites within the segment and  $\sigma$  the estimated standard deviation from all LRR values of a sample, reflecting the noise level in LRR of the sample.

#### **Validation of the DNAJB1-PRKACA fusion transcript**

500 micrograms of RNA were retro-transcribed into cDNA using the High-Capacity cDNA Reverse Transcription Kit from Applied Biosystems following manufacturer's instructions. The resulting cDNA was used as template for semiquantitative polymerase chain reaction (PCR) amplification using the primers: Fw\_DNAJB1-Exon1 5'-GTCAAGGAGATCGCTGAGG-3' and Rv\_PRKACA-Exon3 5'-TTCCCGTCTCCTTGTGTTT-3'. To detect the presence of the fusion product, the PCR amplifications on human tissues were

performed using the following protocol: 95°C for 5 minutes, 34 cycles of 95°C denaturation for 15 seconds, 56°C annealing for 30 seconds, and 68°C extension for 45 seconds, followed by a 5 minute final extension at 68°C. The PCR amplifications were performed in a volume of 35µL reaction mixture containing 1.4mM MgCl<sub>2</sub>, 0.2mM of each dNTP, 0.125mM of each primer, 0.7µL DMSO, 1U of Platinum Taq DNA Polymerase (Invitrogen) and 2µL (100ng) of cDNA. PCR products were purified using the Qiaquick PCR purification kit (Qiagen) and sequenced using an Applied Biosystems 3700 DNA sequencer (ABI PRISM® 3730XL; Applied Biosystems).

### **Whole-exome sequencing chromosomal rearrangements analysis**

One FF FLC-normal liver pair underwent whole-exome sequencing (WES) on HiSeq2000 sequencer (Illumina) with 50X of coverage. Results achieved good quality metrics: high read quality, high mapping rate, low duplication rate and adequate coverage of the target regions. PCR and optical duplicates, as well as low-quality (Q<20) and non-uniquely mapped reads were removed.

In the setting of paired normal-tumor DNA sequencing, somatic copy number variants (sCNV) can be detected from two sources of evidences. (1) The ratio of read depth of tumor vs normal is different in CNV regions from the unchanged regions. Briefly, ratio of a given locus was defined as  $\text{ratio} = (\text{read depth in tumor}) / (\text{read depth in normal})$ . Therefore a value of  $\log_2\text{ratio}$  greater than 0 indicates copy number gain in tumor and less than 0 copy number loss. (2) The nucleotide composition might be altered at germline polymorphic loci (including SNPs and indels) within sCNV regions. At loci with two alternative alleles, the reference allele is referred as “A” allele and non-reference allele as “B” allele. In analogy to CNV data generated from Illumina SNP array, BAF was defined as  $(\text{number of reads supporting B allele}) / (\text{total number of reads at this locus})$ . In normal tissue, at a locus with heterozygous genotype, the number of reads supporting the reference allele and non-reference allele are roughly equal; therefore, BAF would fluctuate closely around 0.5. If the region, where this locus is located, undergoes copy number loss or gain in tumor, the tumor BAF would deviate from 0.5. A simple transformation, defined as  $\text{mBAF} = |\text{BAF} - 0.5| + 0.5$  as in CNV analysis of Illumina array data, can dissolve the arbitrary direction of such deviation with respect to haplotype, so that segmentation algorithm can be readily applicable to this signal<sup>11</sup>. To make noise distribution more adhere to Gaussian,  $\log_2$  of the ratio of mBAF in tumor vs. normal, denoted as  $\log_2\text{mBAF}$  was calculated.

Both  $\log_2\text{ratio}$  and  $\log_2\text{mBAF}$  have spatial correlation with copy number change along chromosomes and existing CNV segmentation methods (e.g. circular binary segmentation,

CBS<sup>12</sup>) can be readily applied. It should be noted that log<sub>2</sub>ratio and log<sub>2</sub>mBAF reflect distinct aspects of CNV and provide orthogonal information in CNV calling. To our experience, log<sub>2</sub>mBAF is more sensitive than log<sub>2</sub>ratio in detecting unbalanced copy number gain or loss. However, log<sub>2</sub>mBAF cannot directly infer the magnitude of copy number change and is not informative in balanced copy number events.

Standard GATK pipeline was applied for raw data processing, read alignment and variants calling. On each observed SNP/indel locus, the total number of reads and number of reads supporting the non-reference allele in normal and tumor tissues respectively was quantified, and used to calculate the log<sub>2</sub>ratio and log<sub>2</sub>mBAF metrics. CBS algorithm (implemented in R package “DNAcopy”<sup>13</sup>) was applied to perform segmentation separately on log<sub>2</sub>ratio and log<sub>2</sub>mBAF spaces. Afterwards, the union of change points called from log<sub>2</sub>ratio and log<sub>2</sub>mBAF were taken, and summarized the segment boundaries. The copy number status is decided for each segment based on the evidences from both log<sub>2</sub>ratio and log<sub>2</sub>mBAF.

#### **Whole-exome sequencing somatic mutation detection**

Remaining reads from the quality control (as detailed in the paragraph above: **Whole-exome sequencing chromosomal rearrangements analysis**) were aligned to the human genome reference 19th version using BWA<sup>16</sup>. Afterwards, somatic SNV were detected using Mutect software<sup>17</sup> and small indels were identified through VarScan2<sup>18</sup>. We calculated p-value using Fisher’s exact test for all putative mutation sites based on the distribution of read support for different alleles in tumor and matched normal samples. The Mutect and VarScan2 software were employed in above analyses because of their desirable feature in detecting mutations in low purity or heterogeneous cancer samples. Purity is defined as the percentage of tumoral cells in the tumor, and of hepatocytes in the normal tissue versus fibroblasts, endothelial and immunological cells, and portal veins in the non-tumoral tissues. FLC tumors presented relatively low purity in both normal and tumor tissues. Among the normal tissues, the purity ranges between 80% and 95%; and 35% to 70% among tumor tissues. Purity information has been factored in mutant allele frequency estimations.

Somatic SNVs were further filtered by Mutect internal threshold, and those SNVs that failed the threshold were excluded. Somatic indels inferred by VarScan2 software were filtered following the criteria: 1) Read depth  $\geq 20$  in both tumor and normal samples, 2) Read support of mutant allele in tumor tissue not as a result of sequencing error (Binomial test,  $p > 0.01$ ), 3) Quality score not significantly lower than other alleles (Wilcoxon rank sum test,  $p > 0.01$ ), 4) Mutant allele frequency change between tumor and adjacent normal  $\geq 20\%$  and Fisher’s Exact



Test p-value < 0.01, 5) Mutant allele not significantly enriched in repeatedly aligned reads, 6) Mutant allele not significantly enriched within 10 bps of 5' or 3' ends of reads (Fisher's exact test,  $p > 0.01$ ) and 7) Mutant allele were observed in both forward and reverse strand of the tumor DNA. Lastly, the resulting mutation were annotated by SNPEff pipeline<sup>19</sup> and scored by SIFT and PolyPhen2, in terms of mutation location, impact on gene product (coding or non-coding, as well as if synonymous or non-synonymous, and missense or non-sense) and the likelihood of the mutation to be functional (damaging, probably damaging, possibly damaging or benign).

*BRCA2* damaging mutation (Y2789C) was validated by Sanger sequencing once PCR amplifications on human tissues were performed using the primers: Fw\_*BRCA2* 5'-GGCAGTTCTAGAAGAATGAAAACCTC-3' and Rv\_*BRCA2* 5'-CGATGATAAGGGCAGAGGAA-3', and following the PCR amplification protocol: 95°C for 2 minutes, 40 cycles of denaturation at 95°C for 30 seconds, 56°C annealing for 30 seconds, 72°C extension for 45 seconds, followed by a 2 minute final extension at 72°C. The PCR amplifications were performed in a volume of 35µL reaction mixture containing 1.5mM MgCl<sub>2</sub>, 0.2mM of each dNTP, 0.125mM of each primer and 1U of Platinum Taq DNA Polymerase (Invitrogen).

#### Targeted-exome sequencing somatic mutation detection

Forty-seven FLCs, 20 FF from the validation-French cohort and 27 FFPE with 14 paired non-tumoral samples from the training cohort, underwent targeted-exome sequencing (TES) by GeneRead DNAseq Targeted Panels V2 (Qiagen) following manufacturer's instructions. TES was applied in the whole *BRCA2* gene, and in 13 exons including the hotspots for *CSMD2*, *ARMCX1*, *COL6A6*, *TERT* promoter, *TP53*, *CTNNB1*, *NFE2L2*, *EGFR*, *BRAF*, *KRAS*, *NRAS*, *IDH1* and *IDH2* genes. However, the sequencing reaction was not successful for *TERT* promoter, *TP53* and *IDH2*. Then, we got good quality reads for *CSMD2*, *ARMCX1*, *COL6A6*, from which we were able to validate the mutations found by WES, and also good quality data for *CTNNB1*, *NFE2L2*, *EGFR*, *BRAF*, *KRAS*, *NRAS*, and *IDH1* genes. However, those genes were not damagingly mutated in any of their hotspots (*EGFR*-L858R, *CTNNB1*-exon 3, *BRAF*-V600X, *NFE2L2*-exon 2, *KRAS*-G12, *NRAS*-Q61, *IDH1*-R132) in any of the 47 FLCs. Those results correlated with the WES data, which also demonstrated no damaging mutations in any of the hotspots for those genes, neither for *TP53*-R249S, *IDH2*-R172, *ARID1A*, *TTN* or *AXIN1*.

Results were filtered by quality control (Q>20) that was performed per base and read, removing and trimming reads with low quality<sup>20</sup>. Reads were aligned to GRCh37/hg19 with

Burrows-Wheeler Aligner algorithm, paired-end mode, and duplicated reads were also removed<sup>16</sup>. Realignment and variant calling was performed with Genome Analysis Toolkit<sup>2</sup>. Variants associated with background polymorphisms (dbSNP b138) have been removed. Genotype quality scores (GQ>30, Read Depth > 30, and ratio AlternativeReads/ReadDepth > 20%) have been used to filter false positive gene mutations events. Variants have also been filtered according to their predicted function (only non-synonymous coding or stop-gaining mutations were considered), assessed by SnpEff pipeline<sup>19</sup>.

### **Prognostic gene expression data analysis**

The 8-gene prognostic signature was obtained using the random survival forest technique (RSF)<sup>21</sup> in those FLC patients that have been resected, excluding those transplanted. This is a method for prediction and variable selection using right-censored survival and competing risk data by growing survival trees to estimate a cumulative hazard function (CHF), which derives from each tree of the RSF. As input, we used the 15,169 Illumina probes which passed the quality filters<sup>1,3</sup>. First, probes were randomly split in 8 sets to fit a model using the RSF method by growing 10,000 survival trees. Variable importance scores (VIMP) were computed for all probes used to grow the trees, and those with VIMP > 0.01 were selected to fit a new model using the same RSF method. Once the model was built, redundant variables were removed by generating incremental RSF models adding one more probe at each step, ranked by the VIMP calculated in the previous model. This allowed us to get an estimation of the error as a measure of how correctly the ensemble classified two random individuals in terms of survival. As an extra step for removing the redundancy and reduce the signature to the minimum number of probes, a new model was constructed with those probes able to improve the prediction error better than the expected by adding a random probe. Therefore, the expression signature was based upon 8 non-redundant genes.

From the last RSF model, we generated a risk score (i.e. mortality index (MI), range 6.7-42) based on the 8-gene signature for each individual, computed as a sum over the CHF for each individual evaluated at distinct time points weighed by the number of individuals at risk at that moment. Using the reported MI, our cohort was divided into 2 risk groups, the upper quartile (Poor-prognosis, MI  $\geq$  21) and the 3 remaining quartiles (Non poor-prognosis, MI < 21). We were able to show that the risk obtained from the signature, correlated with the survival through the Kaplan-Meier estimator. This signature was assessed to calculate the MI related to

recurrence in the training cohort, being able to stratify those patients based on the upper MI quartile as threshold. The prognostic 8-gene signature was used to calculate the MI in an independent cohort to validate its capacity to predict survival. The expression values of the validation French-cohort samples were obtained from the hybridization of the mRNA extracted as previously published<sup>15</sup> in the HumanHT-12\_V4.0 whole genome expression array from Illumina.

The integration of the two datasets (i.e. training and validation) was performed using the virtualArray<sup>22</sup> package from Bioconductor<sup>23</sup>, which merges independent sets of samples by gene name and normalizes for batch effect by using surrogate variable analysis<sup>24</sup>. All analyses were performed using the R statistical package ([www.r-project.org](http://www.r-project.org)).

### **Clinical data and Statistical Analysis**

Comparisons of continuous variables between 2 classes were performed with the Mann–Whitney U test. Spearman coefficient was used to assess correlations between continuous variables. Fisher exact test was used to compare proportions. Bonferroni correction for multiple hypothesis testing was applied when appropriate. Kaplan-Meier method and log-rank test were performed to analyze the association of molecular and clinical variables with overall survival and tumor recurrence.

### **Supplementary REFERENCES**

1. Hoshida Y, Villanueva A, Kobayashi M, et al. Gene expression in fixed tissues and outcome in hepatocellular carcinoma. *N Engl J Med* 2008;359:1995-2004.
2. DePristo MA, Banks E, Poplin R, et al. A framework for variation discovery and genotyping using next-generation DNA sequencing data. *Nat Genet* 2011;43:491-8.
3. Reich M, Liefeld T, Gould J, et al. GenePattern 2.0. *Nat Genet* 2006;38:500-1.
4. Brunet JP, Tamayo P, Golub TR, et al. Metagenes and molecular pattern discovery using matrix factorization. *Proc Natl Acad Sci U S A* 2004;101:4164-9.
5. Frey BJ, Dueck D. Clustering by passing messages between data points. *Science* 2007;315:972-6.
6. Subramanian A, Tamayo P, Mootha VK, et al. Gene set enrichment analysis: a knowledge-based approach for interpreting genome-wide expression profiles. *Proc Natl Acad Sci U S A* 2005;102:15545-50.
7. Liberzon A, Subramanian A, Pinchback R, et al. Molecular signatures database (MSigDB) 3.0. *Bioinformatics* 2011;27:1739-40.
8. Hoshida Y, Toffanin S, Lachenmayer A, et al. Molecular classification and novel targets in hepatocellular carcinoma: recent advancements. *Semin Liver Dis* 2010;30:35-51.

9. Mermel CH, Schumacher SE, Hill B, et al. GISTIC2.0 facilitates sensitive and confident localization of the targets of focal somatic copy-number alteration in human cancers. *Genome Biol* 2011;12:R41.
10. Peiffer DA, Le JM, Steemers FJ, et al. High-resolution genomic profiling of chromosomal aberrations using Infinium whole-genome genotyping. *Genome Res* 2006;16:1136-48.
11. Staaf J, Lindgren D, Vallon-Christersson J, et al. Segmentation-based detection of allelic imbalance and loss-of-heterozygosity in cancer cells using whole genome SNP arrays. *Genome Biol* 2008;9:R136.
12. Olshen AB, Venkatraman ES, Lucito R, et al. Circular binary segmentation for the analysis of array-based DNA copy number data. *Biostatistics* 2004;5:557-72.
13. Venkatraman ES, Olshen AB. A faster circular binary segmentation algorithm for the analysis of array CGH data. *Bioinformatics* 2007;23:657-63.
14. Benjamini YH, Y. Controlling the false discovery rate: a practical and powerful approach to multiple testing. *Journal of the Royal Statistical Society Series B*, 1995;57:289–300.
15. Wurmbach E, Chen YB, Khitrov G, et al. Genome-wide molecular profiles of HCV-induced dysplasia and hepatocellular carcinoma. *Hepatology* 2007;45:938-47.
16. Li H, Durbin R. Fast and accurate short read alignment with Burrows-Wheeler transform. *Bioinformatics* 2009;25:1754-60.
17. Cibulskis K, Lawrence MS, Carter SL, et al. Sensitive detection of somatic point mutations in impure and heterogeneous cancer samples. *Nat Biotechnol*;31:213-9.
18. Koboldt DC, Zhang Q, Larson DE, et al. VarScan 2: somatic mutation and copy number alteration discovery in cancer by exome sequencing. *Genome Res* 2012;22:568-76.
19. Cingolani P, Platts A, Wang le L, et al. A program for annotating and predicting the effects of single nucleotide polymorphisms, SnpEff: SNPs in the genome of *Drosophila melanogaster* strain w1118; iso-2; iso-3. *Fly (Austin)* 2012;6:80-92.
20. [http://www.bioinformatics.babraham.ac.uk/projects/trim\\_galore/](http://www.bioinformatics.babraham.ac.uk/projects/trim_galore/).
21. Ishwaran H KU, Chen X, Minn AJ. 2011; 4: 115–32. Random survival forests for high-dimensional data. *Statistical Analy Data Mining* 2011;4 115–32.
22. Heider A, Alt R. virtualArray: a R/bioconductor package to merge raw data from different microarray platforms. *BMC Bioinformatics* 2013;14:75.
23. Gentleman RC CV, Bates DM, Bolstad B, Dettling M, Dudoit S, Ellis B, Gautier L, Ge Y, Gentry J. Bioconductor: open software development for computational biology and bioinformatics. *Genome Biol* 2004;5:R80.
24. Leek JT, Johnson WE, Parker HS, et al. The sva package for removing batch effects and other unwanted variation in high-throughput experiments. *Bioinformatics* 2012;28:882-3.

### **Supplementary TABLES**

Suppl. Figure 1

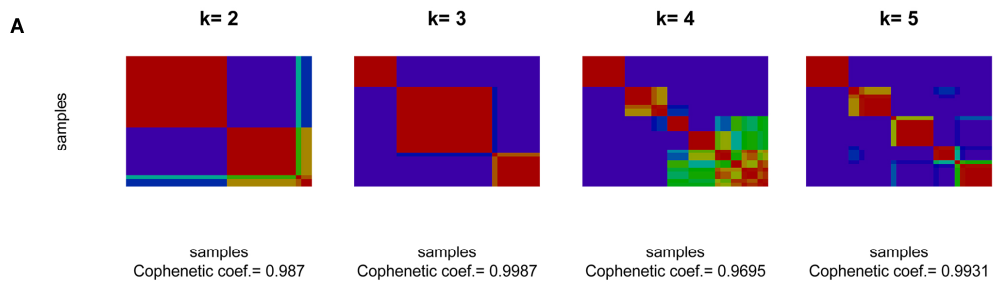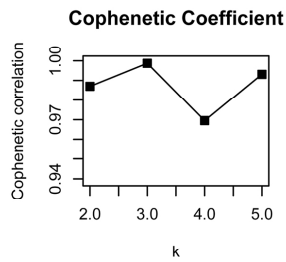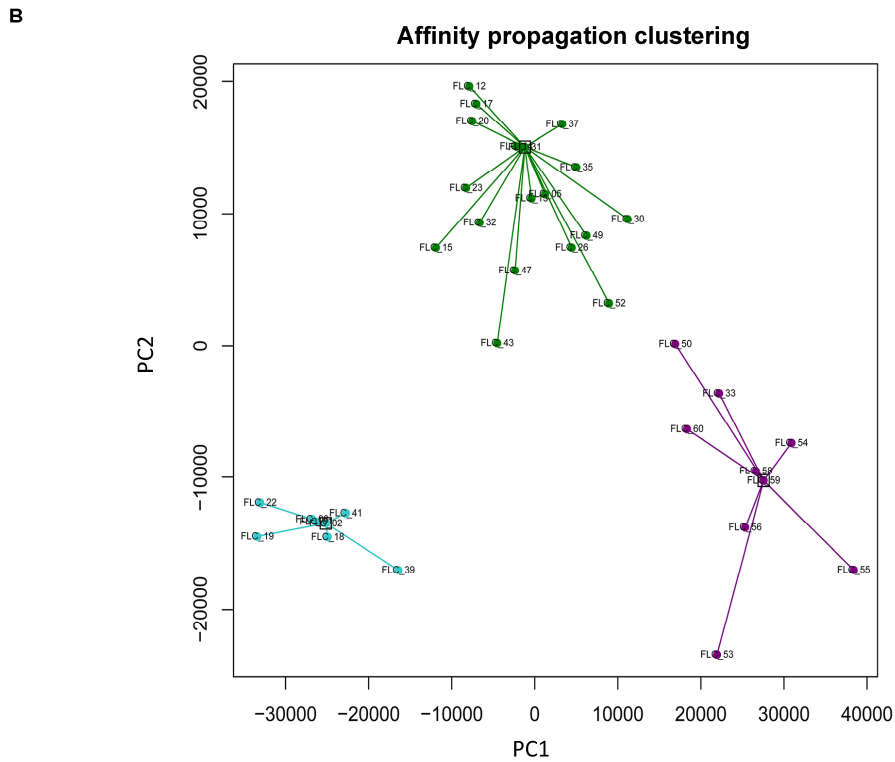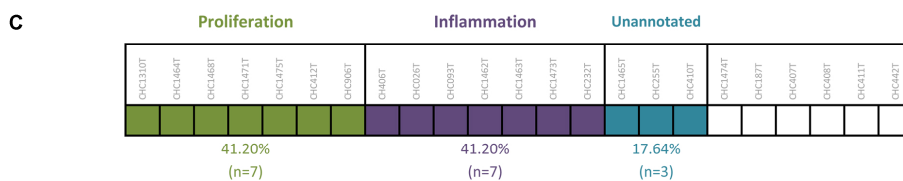

Suppl. Figure 2

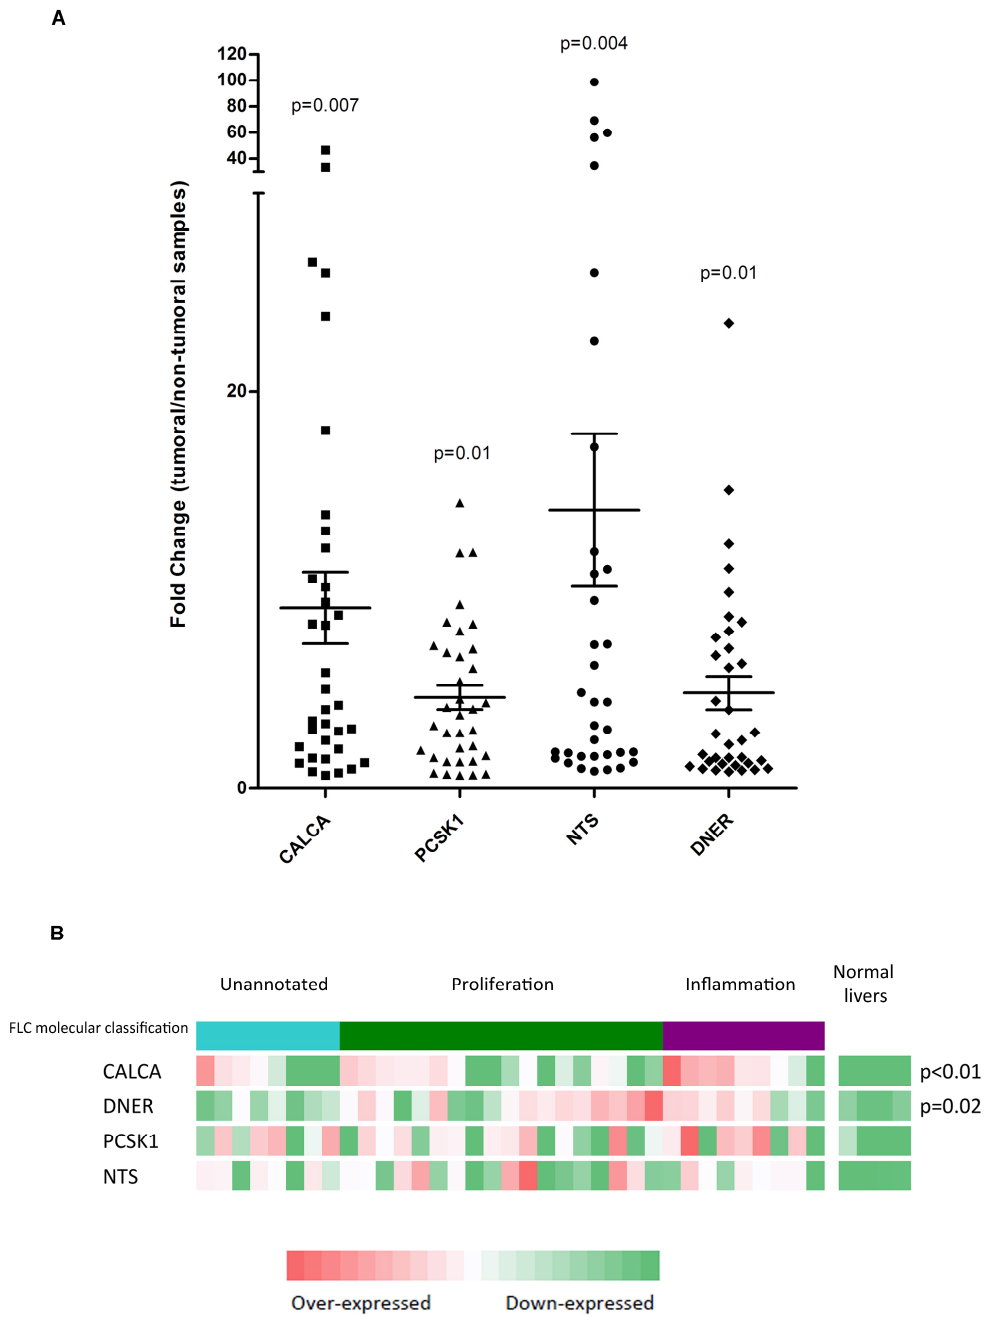

Suppl. Figure 3

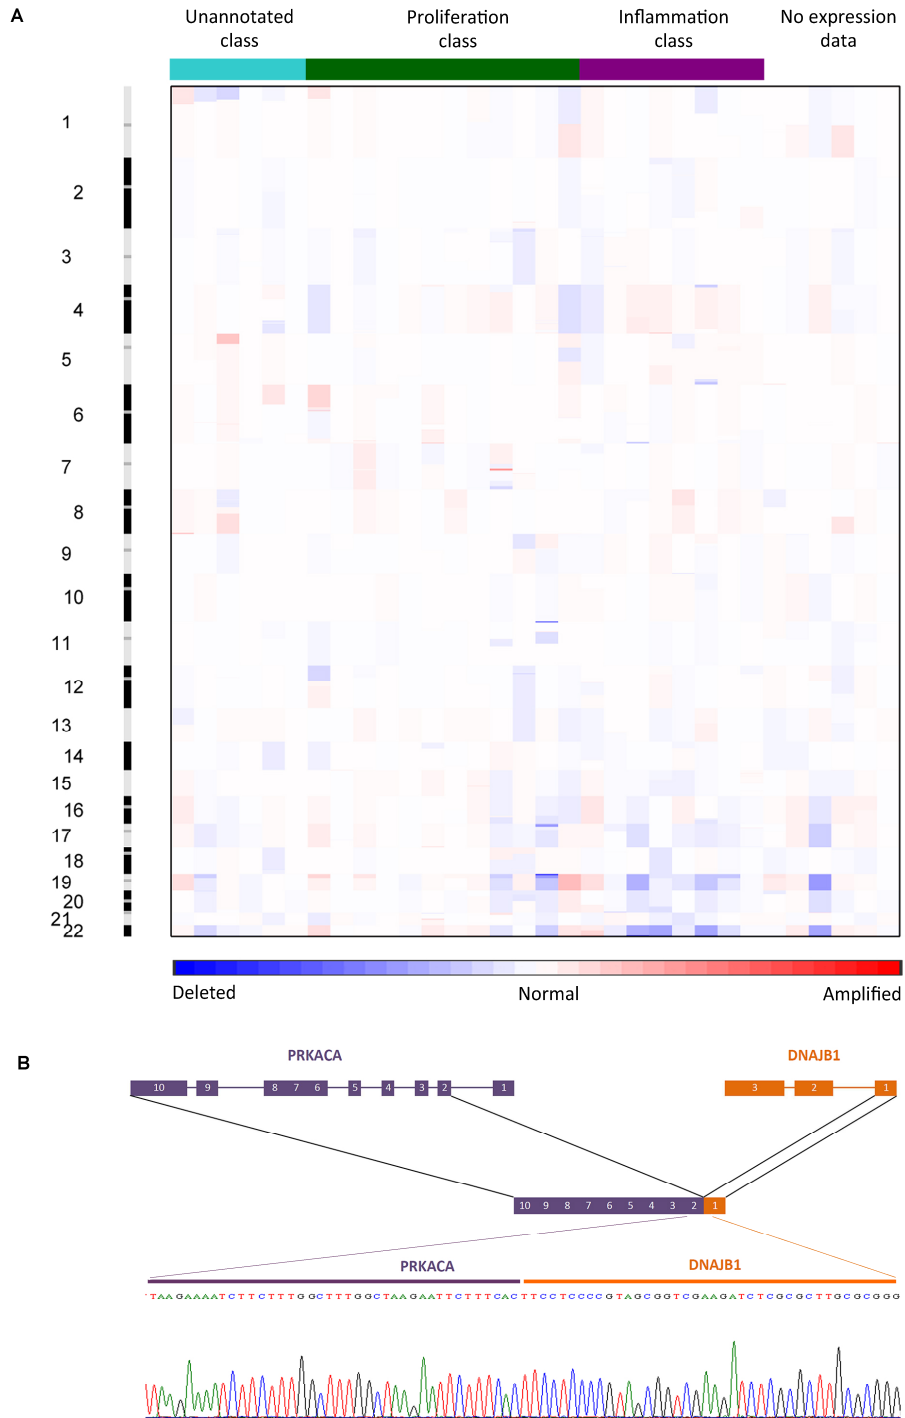

Suppl. Figure 4

A

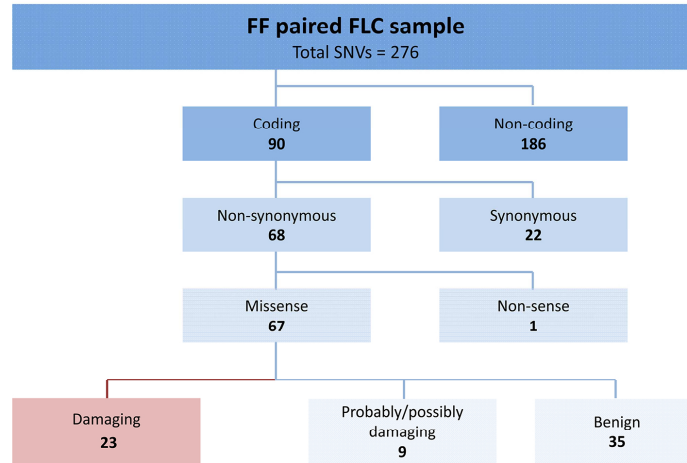

B

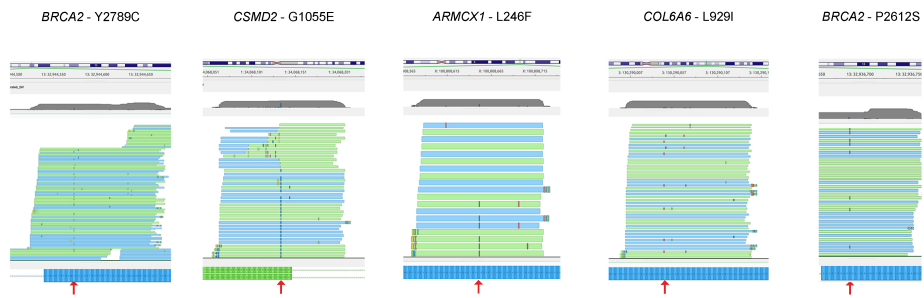

C

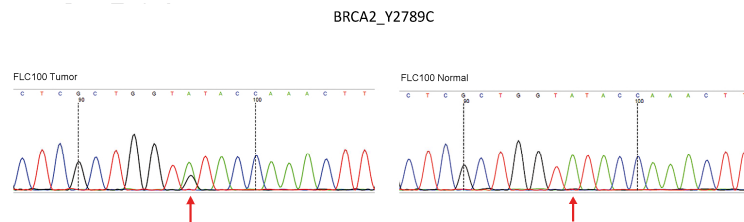



**Supplementary Table 11.** Mortality Index for the different prognostic group samples**Training Set - Survival**

| <b>Sample ID</b> | <b>Survival status</b> | <b>Mortality Index</b> | <b>Prognosis group</b> |
|------------------|------------------------|------------------------|------------------------|
| FLC56            | 1                      | 42.06                  | Poor-prognosis         |
| FLC59            | 1                      | 38.22                  | Poor-prognosis         |
| FLC17            | 1                      | 33.05                  | Poor-prognosis         |
| FLC60            | 1                      | 31.10                  | Poor-prognosis         |
| FLC55            | 1                      | 29.37                  | Poor-prognosis         |
| FLC31            | 1                      | 23.46                  | Poor-prognosis         |
| FLC32            | 1                      | 21.08                  | Poor-prognosis         |
| FLC22            | 1                      | 20.68                  | Non poor-prognosis     |
| FLC47            | 1                      | 20.23                  | Non poor-prognosis     |
| FLC14            | 1                      | 18.37                  | Non poor-prognosis     |
| FLC50            | 1                      | 17.36                  | Non poor-prognosis     |
| FLC37            | 0                      | 14.56                  | Non poor-prognosis     |
| FLC12            | 0                      | 13.67                  | Non poor-prognosis     |
| FLC23            | 0                      | 12.22                  | Non poor-prognosis     |
| FLC53            | 1                      | 11.76                  | Non poor-prognosis     |
| FLC58            | 0                      | 11.51                  | Non poor-prognosis     |
| FLC35            | 0                      | 10.89                  | Non poor-prognosis     |
| FLC19            | 0                      | 10.74                  | Non poor-prognosis     |
| FLC41            | 1                      | 10.19                  | Non poor-prognosis     |
| FLC33            | 0                      | 10.09                  | Non poor-prognosis     |
| FLC13            | 1                      | 8.71                   | Non poor-prognosis     |
| FLC54            | 0                      | 8.21                   | Non poor-prognosis     |
| FLC05            | 0                      | 7.28                   | Non poor-prognosis     |
| FLC08            | 0                      | 6.95                   | Non poor-prognosis     |
| FLC43            | 0                      | 6.87                   | Non poor-prognosis     |
| FLC49            | 0                      | 6.78                   | Non poor-prognosis     |
| FLC52            | 0                      | 6.74                   | Non poor-prognosis     |
| FLC39            | 0                      | 6.73                   | Non poor-prognosis     |
| FLC01            | 0                      | 6.71                   | Non poor-prognosis     |

**Training Set - Recurrence**

| <b>Sample ID</b> | <b>Survival status</b> | <b>Mortality Index</b> | <b>Prognosis group</b> |
|------------------|------------------------|------------------------|------------------------|
| FLC_56           | 1                      | 36.72                  | Poor-prognosis         |
| FLC_17           | 1                      | 35.06                  | Poor-prognosis         |
| FLC_32           | 1                      | 31.32                  | Poor-prognosis         |
| FLC_47           | 1                      | 28.71                  | Poor-prognosis         |
| FLC_55           | 1                      | 27.87                  | Poor-prognosis         |
| FLC_23           | 1                      | 25.45                  | Poor-prognosis         |
| FLC_14           | 1                      | 24.08                  | Non poor-prognosis     |
| FLC_31           | 1                      | 23.82                  | Non poor-prognosis     |
| FLC_22           | 1                      | 23.10                  | Non poor-prognosis     |
| FLC_50           | 1                      | 22.17                  | Non poor-prognosis     |
| FLC_13           | 1                      | 21.85                  | Non poor-prognosis     |
| FLC_05           | 1                      | 20.39                  | Non poor-prognosis     |

|        |   |       |                    |
|--------|---|-------|--------------------|
| FLC_12 | 0 | 19.68 | Non poor-prognosis |
| FLC_43 | 1 | 19.03 | Non poor-prognosis |
| FLC_41 | 1 | 18.02 | Non poor-prognosis |
| FLC_35 | 0 | 16.58 | Non poor-prognosis |
| FLC_33 | 1 | 15.55 | Non poor-prognosis |
| FLC_19 | 1 | 14.49 | Non poor-prognosis |
| FLC_53 | 1 | 14.11 | Non poor-prognosis |
| FLC_49 | 1 | 13.93 | Non poor-prognosis |
| FLC_58 | 0 | 13.43 | Non poor-prognosis |
| FLC_54 | 0 | 11.10 | Non poor-prognosis |
| FLC_52 | 0 | 10.94 | Non poor-prognosis |
| FLC_01 | 0 | 10.91 | Non poor-prognosis |
| FLC_39 | 1 | 10.10 | Non poor-prognosis |
| FLC_08 | 0 | 9.06  | Non poor-prognosis |

#### Validation Set - Survival

| Sample ID | Survival status | Mortality Index | Prognosis group    |
|-----------|-----------------|-----------------|--------------------|
| CHC412T   | 1               | 8.49            | Poor-prognosis     |
| CHC187T   | 1               | 8.44            | Poor-prognosis     |
| CHC411T   | 1               | 8.32            | Poor-prognosis     |
| CHC906T   | 1               | 8.31            | Poor-prognosis     |
| CHC255T   | 1               | 8.23            | Poor-prognosis     |
| CHC1471T  | 1               | 8.00            | Poor-prognosis     |
| CHC026T   | 1               | 7.93            | Non poor-prognosis |
| CHC1468T  | 0               | 7.90            | Non poor-prognosis |
| CHC1463T  | 0               | 7.89            | Non poor-prognosis |
| CHC442T   | 0               | 7.83            | Non poor-prognosis |
| CHC408T   | 0               | 7.69            | Non poor-prognosis |
| CHC093T   | 1               | 7.65            | Non poor-prognosis |
| CHC1464T  | 0               | 7.50            | Non poor-prognosis |
| CHC1465T  | 0               | 7.38            | Non poor-prognosis |
| CHC1474T  | 1               | 7.30            | Non poor-prognosis |
| CHC1310T  | 0               | 7.26            | Non poor-prognosis |
| CHC232T   | 0               | 7.03            | Non poor-prognosis |
| CHC410T   | 0               | 6.69            | Non poor-prognosis |
| CHC407T   | 0               | 6.67            | Non poor-prognosis |
| CHC406T   | 0               | 6.26            | Non poor-prognosis |
| CHC1462T  | 0               | 5.86            | Non poor-prognosis |
| CHC1473T  | 0               | 5.38            | Non poor-prognosis |

**Supplementary Table 2.** Leave-one-out cross validation of FLC subclasses

| <b>Prediction Method</b> | <b># Error</b> | <b>% Correct Prediction</b> |
|--------------------------|----------------|-----------------------------|
| k-nearest neighbor       | 2              | 94%                         |

| Gene symbol | Molecular class | tstat  |
|-------------|-----------------|--------|
| RAB40C      | Unannotated     | 14.237 |
| GCN1L1      | Unannotated     | 13.242 |
| DAP3        | Unannotated     | 13.072 |
| BRWD2       | Unannotated     | 11.640 |
| MRPL36      | Unannotated     | 11.616 |
| NUP188      | Unannotated     | 11.392 |
| ASXL1       | Unannotated     | 10.963 |
| DPAGT1      | Unannotated     | 10.959 |
| ZNF16       | Unannotated     | 10.390 |
| NSDHL       | Unannotated     | 10.193 |
| ASAP3       | Unannotated     | 10.089 |
| NEURL1B     | Unannotated     | 9.845  |
| KCNJ5       | Unannotated     | 9.759  |
| USP16       | Unannotated     | 9.682  |
| C6ORF47     | Unannotated     | 9.659  |
| ATP6V0E1    | Unannotated     | 9.470  |
| NCOA4       | Unannotated     | 9.427  |
| UBL4A       | Unannotated     | 9.335  |
| BUB3        | Unannotated     | 9.295  |
| UBR7        | Unannotated     | 9.267  |
| LASP1       | Unannotated     | 9.220  |
| TUG1        | Unannotated     | 9.182  |
| ZC3HC1      | Unannotated     | 9.169  |
| IRF3        | Unannotated     | 9.113  |
| INTS4       | Unannotated     | 9.054  |
| UROS        | Unannotated     | 9.040  |
| ZNHIT1      | Unannotated     | 8.977  |
| YTHDC2      | Unannotated     | 8.975  |
| TMEM177     | Unannotated     | 8.880  |
| EIF3K       | Unannotated     | 8.800  |
| SF3B3       | Unannotated     | 8.791  |
| C20ORF20    | Unannotated     | 8.731  |
| KIAA1310    | Unannotated     | 8.653  |
| BRMS1       | Unannotated     | 8.628  |
| PRPF8       | Unannotated     | 8.604  |
| METTL13     | Unannotated     | 8.548  |
| FAM105B     | Unannotated     | 8.526  |
| RAB1A       | Unannotated     | 8.444  |
| RPAIN       | Unannotated     | 8.438  |
| PSMC6       | Unannotated     | 8.314  |
| TBC1D3H     | Unannotated     | 8.300  |
| PRRC1       | Unannotated     | 8.296  |
| PRKCDBP     | Unannotated     | 8.242  |
| TRIM39      | Unannotated     | 8.199  |
| CLUAP1      | Unannotated     | 8.167  |
| ATG4B       | Unannotated     | 8.134  |
| IPO13       | Unannotated     | 8.105  |

|           |             |       |
|-----------|-------------|-------|
| KARS      | Unannotated | 8.060 |
| RP9       | Unannotated | 8.001 |
| UBN1      | Unannotated | 7.997 |
| TSPYL1    | Unannotated | 7.991 |
| MPHOSPH10 | Unannotated | 7.966 |
| SETD1A    | Unannotated | 7.850 |
| SLC35B1   | Unannotated | 7.816 |
| C19ORF22  | Unannotated | 7.803 |
| INTS9     | Unannotated | 7.785 |
| RIT1      | Unannotated | 7.766 |
| ERGIC3    | Unannotated | 7.765 |
| ZNF586    | Unannotated | 7.738 |
| GHITM     | Unannotated | 7.714 |
| RANBP1    | Unannotated | 7.669 |
| CNOT6     | Unannotated | 7.661 |
| LPHN1     | Unannotated | 7.644 |
| VPS45     | Unannotated | 7.638 |
| ROD1      | Unannotated | 7.637 |
| MAPK6     | Unannotated | 7.598 |
| ZDHHC7    | Unannotated | 7.591 |
| LYST      | Unannotated | 7.562 |
| UBB       | Unannotated | 7.514 |
| CUGBP1    | Unannotated | 7.503 |
| ROBLD3    | Unannotated | 7.463 |
| ALDH9A1   | Unannotated | 7.403 |
| WRNIP1    | Unannotated | 7.381 |
| IFITM3    | Unannotated | 7.376 |
| MCM3AP    | Unannotated | 7.339 |
| AP2S1     | Unannotated | 7.316 |
| ATP5SL    | Unannotated | 7.314 |
| TMEM170B  | Unannotated | 7.314 |
| SAP30L    | Unannotated | 7.313 |
| C20ORF96  | Unannotated | 7.312 |
| FEN1      | Unannotated | 7.309 |
| UBAP2     | Unannotated | 7.302 |
| SNRNP48   | Unannotated | 7.297 |
| RNASEK    | Unannotated | 7.266 |
| DNAJB11   | Unannotated | 7.225 |
| GRINA     | Unannotated | 7.201 |
| L3MBTL2   | Unannotated | 7.198 |
| TSFM      | Unannotated | 7.179 |
| HRB       | Unannotated | 7.149 |
| VCL       | Unannotated | 7.139 |
| MIA       | Unannotated | 7.115 |
| ABCA1     | Unannotated | 7.109 |
| IMPDH2    | Unannotated | 7.103 |
| TOR1A     | Unannotated | 7.102 |
| ZNF8      | Unannotated | 7.093 |
| RBP4      | Unannotated | 7.085 |
| GOLGA5    | Unannotated | 7.084 |

|          |             |       |
|----------|-------------|-------|
| DDHD2    | Unannotated | 7.082 |
| CCDC21   | Unannotated | 7.077 |
| PHB2     | Unannotated | 7.071 |
| URM1     | Unannotated | 7.067 |
| SERPINB9 | Unannotated | 7.055 |
| FLJ45966 | Unannotated | 7.050 |
| ASCC1    | Unannotated | 7.036 |
| SNX14    | Unannotated | 7.025 |
| TRIM11   | Unannotated | 7.019 |
| PI4KA    | Unannotated | 7.018 |
| VPS11    | Unannotated | 6.979 |
| FAM82A2  | Unannotated | 6.939 |
| CEP170   | Unannotated | 6.897 |
| MMS19    | Unannotated | 6.883 |
| ESD      | Unannotated | 6.878 |
| XPOT     | Unannotated | 6.864 |
| TULP4    | Unannotated | 6.855 |
| AQR      | Unannotated | 6.854 |
| LTBR     | Unannotated | 6.843 |
| ZZZ3     | Unannotated | 6.826 |
| TSTD2    | Unannotated | 6.826 |
| NME4     | Unannotated | 6.813 |
| SP140L   | Unannotated | 6.773 |
| NOTCH3   | Unannotated | 6.763 |
| ARID4B   | Unannotated | 6.759 |
| PRAGMIN  | Unannotated | 6.756 |
| RHOC     | Unannotated | 6.750 |
| CSTF3    | Unannotated | 6.744 |
| LRCH3    | Unannotated | 6.743 |
| NCOA6    | Unannotated | 6.741 |
| IRF9     | Unannotated | 6.726 |
| GTF2I    | Unannotated | 6.708 |
| HARS2    | Unannotated | 6.689 |
| RBM33    | Unannotated | 6.650 |
| PDPN     | Unannotated | 6.648 |
| RXRB     | Unannotated | 6.644 |
| PRKRIR   | Unannotated | 6.637 |
| DKC1     | Unannotated | 6.634 |
| RPUSD3   | Unannotated | 6.627 |
| CMAS     | Unannotated | 6.622 |
| EIF3G    | Unannotated | 6.616 |
| FXC1     | Unannotated | 6.597 |
| CALR     | Unannotated | 6.596 |
| YY1AP1   | Unannotated | 6.564 |
| PIP4K2A  | Unannotated | 6.562 |
| PDCD2    | Unannotated | 6.550 |
| MRFAP1L1 | Unannotated | 6.546 |
| SLC6A16  | Unannotated | 6.496 |
| TOMM34   | Unannotated | 6.489 |
| FCHSD2   | Unannotated | 6.470 |

|          |             |       |
|----------|-------------|-------|
| C19ORF2  | Unannotated | 6.469 |
| MRPL17   | Unannotated | 6.458 |
| DOLK     | Unannotated | 6.457 |
| ETF1     | Unannotated | 6.452 |
| C7ORF55  | Unannotated | 6.451 |
| ILK      | Unannotated | 6.446 |
| RECQL    | Unannotated | 6.444 |
| ZFYVE16  | Unannotated | 6.443 |
| UBE3A    | Unannotated | 6.425 |
| ZNF234   | Unannotated | 6.420 |
| LYAR     | Unannotated | 6.415 |
| SKP1A    | Unannotated | 6.410 |
| SLC35E3  | Unannotated | 6.402 |
| CSK      | Unannotated | 6.352 |
| CYBASC3  | Unannotated | 6.349 |
| SMAD2    | Unannotated | 6.328 |
| IQCK     | Unannotated | 6.323 |
| NUDCD3   | Unannotated | 6.317 |
| DKAKD    | Unannotated | 6.316 |
| ZSWIM1   | Unannotated | 6.316 |
| ZNHIT6   | Unannotated | 6.315 |
| CCS      | Unannotated | 6.308 |
| PIK3R2   | Unannotated | 6.301 |
| MORF4L2  | Unannotated | 6.288 |
| KCNC3    | Unannotated | 6.278 |
| SLC35D2  | Unannotated | 6.245 |
| CHMP4B   | Unannotated | 6.228 |
| NECAP2   | Unannotated | 6.223 |
| AGAP8    | Unannotated | 6.217 |
| DCTN2    | Unannotated | 6.186 |
| FAM171A1 | Unannotated | 6.184 |
| VEZT     | Unannotated | 6.184 |
| UTP14C   | Unannotated | 6.183 |
| DPH3     | Unannotated | 6.179 |
| ERH      | Unannotated | 6.173 |
| SNRPA    | Unannotated | 6.171 |
| TSC2     | Unannotated | 6.168 |
| CDC42BPB | Unannotated | 6.163 |
| COPZ1    | Unannotated | 6.157 |
| MESDC2   | Unannotated | 6.153 |
| SFT2D1   | Unannotated | 6.152 |
| SLFN12   | Unannotated | 6.142 |
| RFP      | Unannotated | 6.137 |
| QKI      | Unannotated | 6.134 |
| SP100    | Unannotated | 6.133 |
| HEATR6   | Unannotated | 6.119 |
| USP7     | Unannotated | 6.118 |
| CPT1C    | Unannotated | 6.112 |
| ARMCX6   | Unannotated | 6.106 |
| ATG9A    | Unannotated | 6.094 |

|          |               |       |
|----------|---------------|-------|
| CCNH     | Unannotated   | 6.090 |
| NFIX     | Unannotated   | 6.086 |
| C8ORF33  | Unannotated   | 6.074 |
| ACTG1    | Unannotated   | 6.065 |
| SFRS6    | Unannotated   | 6.045 |
| FAM122A  | Unannotated   | 6.043 |
| HDAC3    | Unannotated   | 6.030 |
| GNB1     | Unannotated   | 6.022 |
| C2ORF56  | Unannotated   | 6.021 |
| CYB561D1 | Unannotated   | 6.020 |
| SLC25A3  | Unannotated   | 6.019 |
| CCDC53   | Unannotated   | 6.017 |
| GPATCH8  | Unannotated   | 6.000 |
| C19ORF53 | Unannotated   | 5.998 |
| C17ORF95 | Unannotated   | 5.993 |
| PNPO     | Unannotated   | 5.990 |
| FBXL10   | Unannotated   | 5.987 |
| ZCWPW1   | Unannotated   | 5.976 |
| C1QBP    | Unannotated   | 5.974 |
| SH3GL1   | Unannotated   | 5.969 |
| DBNL     | Unannotated   | 5.968 |
| PSMC1    | Unannotated   | 5.965 |
| ZNF860   | Unannotated   | 5.960 |
| ZNF613   | Unannotated   | 5.946 |
| DYNLT1   | Unannotated   | 5.943 |
| UBE2V2   | Unannotated   | 5.921 |
| OTUD4    | Unannotated   | 5.920 |
| SEC22C   | Unannotated   | 5.914 |
| RPUSD2   | Unannotated   | 5.914 |
| ZNF395   | Unannotated   | 5.907 |
| GIPC1    | Unannotated   | 5.904 |
| NDFIP1   | Proliferation | 9.920 |
| TMEM205  | Proliferation | 9.777 |
| NANP     | Proliferation | 9.346 |
| PPP6C    | Proliferation | 9.329 |
| RNF181   | Proliferation | 9.254 |
| KLHDC3   | Proliferation | 9.109 |
| NPC2     | Proliferation | 9.005 |
| N6AMT2   | Proliferation | 8.988 |
| REV1     | Proliferation | 8.767 |
| FNTA     | Proliferation | 8.731 |
| SEPT9    | Proliferation | 8.715 |
| SIN3A    | Proliferation | 8.649 |
| BRAF     | Proliferation | 8.643 |
| WAC      | Proliferation | 8.642 |
| YIF1A    | Proliferation | 8.498 |
| MRPL18   | Proliferation | 8.322 |
| PPP2CA   | Proliferation | 8.303 |
| CCT8     | Proliferation | 8.190 |
| FOXN2    | Proliferation | 8.136 |



|           |               |       |
|-----------|---------------|-------|
| ABHD5     | Proliferation | 8.076 |
| SEC31A    | Proliferation | 8.026 |
| DNAJC8    | Proliferation | 8.000 |
| BTAF1     | Proliferation | 7.996 |
| SIKE      | Proliferation | 7.895 |
| MED6      | Proliferation | 7.867 |
| GTF2H2    | Proliferation | 7.730 |
| KLF3      | Proliferation | 7.717 |
| GAK       | Proliferation | 7.589 |
| DARS      | Proliferation | 7.569 |
| EIF3L     | Proliferation | 7.502 |
| MRFAP1    | Proliferation | 7.473 |
| P76       | Proliferation | 7.440 |
| LAMA5     | Proliferation | 7.419 |
| SNORD71   | Proliferation | 7.386 |
| ATL2      | Proliferation | 7.368 |
| RBM18     | Proliferation | 7.360 |
| HSPA4     | Proliferation | 7.356 |
| BRP44L    | Proliferation | 7.351 |
| SRPK1     | Proliferation | 7.342 |
| MITD1     | Proliferation | 7.326 |
| FAM125A   | Proliferation | 7.309 |
| RPUSD4    | Proliferation | 7.230 |
| NDUFA4    | Proliferation | 7.199 |
| NCKAP1    | Proliferation | 7.190 |
| ZFAND6    | Proliferation | 7.186 |
| CTGLF3    | Proliferation | 7.180 |
| SAPS3     | Proliferation | 7.176 |
| EIF3F     | Proliferation | 7.115 |
| LOC644907 | Proliferation | 7.112 |
| HP1BP3    | Proliferation | 7.078 |
| EEA1      | Proliferation | 7.071 |
| MAP1LC3A  | Proliferation | 7.023 |
| MRPS31    | Proliferation | 7.020 |
| PIGY      | Proliferation | 7.008 |
| GNG2      | Proliferation | 6.999 |
| TPST2     | Proliferation | 6.977 |
| ECD       | Proliferation | 6.960 |
| ELF1      | Proliferation | 6.958 |
| H1FO      | Proliferation | 6.941 |
| BAMBI     | Proliferation | 6.934 |
| OSBP2     | Proliferation | 6.931 |
| UTX       | Proliferation | 6.931 |
| ANKRD11   | Proliferation | 6.909 |
| RANGAP1   | Proliferation | 6.901 |
| SIPA1     | Proliferation | 6.896 |
| TMED2     | Proliferation | 6.883 |
| PIN1      | Proliferation | 6.878 |
| GNG12     | Proliferation | 6.859 |
| EIF4G2    | Proliferation | 6.814 |

|           |               |       |
|-----------|---------------|-------|
| UBE2D2    | Proliferation | 6.786 |
| UTP6      | Proliferation | 6.768 |
| SEPHS1    | Proliferation | 6.768 |
| RUFY2     | Proliferation | 6.760 |
| AASDH     | Proliferation | 6.749 |
| CHD2      | Proliferation | 6.716 |
| C12ORF41  | Proliferation | 6.695 |
| PAWR      | Proliferation | 6.636 |
| U2AF2     | Proliferation | 6.627 |
| HDAC1     | Proliferation | 6.613 |
| ANAPC1    | Proliferation | 6.604 |
| MTMR6     | Proliferation | 6.586 |
| CSNK1E    | Proliferation | 6.586 |
| COX4I1    | Proliferation | 6.568 |
| AP1S2     | Proliferation | 6.560 |
| MYH9      | Proliferation | 6.549 |
| FARP1     | Proliferation | 6.546 |
| KIAA0776  | Proliferation | 6.544 |
| RNF160    | Proliferation | 6.533 |
| RPL26     | Proliferation | 6.504 |
| SNRPN     | Proliferation | 6.490 |
| NSUN2     | Proliferation | 6.479 |
| NDUFB10   | Proliferation | 6.470 |
| CHCHD4    | Proliferation | 6.468 |
| NENF      | Proliferation | 6.457 |
| EMD       | Proliferation | 6.448 |
| CAPZA2    | Proliferation | 6.448 |
| NDUFB8    | Proliferation | 6.446 |
| NUDT3     | Proliferation | 6.424 |
| C11ORF58  | Proliferation | 6.395 |
| FAM53C    | Proliferation | 6.385 |
| PPM1M     | Proliferation | 6.381 |
| DMTF1     | Proliferation | 6.380 |
| RNF170    | Proliferation | 6.379 |
| CASP3     | Proliferation | 6.374 |
| HERC4     | Proliferation | 6.330 |
| BMPR2     | Proliferation | 6.313 |
| GFPT1     | Proliferation | 6.298 |
| CCDC90B   | Proliferation | 6.277 |
| SFRS18    | Proliferation | 6.268 |
| PDCD6IP   | Proliferation | 6.261 |
| LOC374395 | Proliferation | 6.259 |
| SNAP29    | Proliferation | 6.222 |
| EIF4E2    | Proliferation | 6.200 |
| C1ORF52   | Proliferation | 6.197 |
| SPRYD3    | Proliferation | 6.195 |
| CDKN2AIP  | Proliferation | 6.166 |
| HADHA     | Proliferation | 6.161 |
| MED13     | Proliferation | 6.156 |
| SPOP      | Proliferation | 6.153 |

|          |               |       |
|----------|---------------|-------|
| ACAP2    | Proliferation | 6.150 |
| SLC30A7  | Proliferation | 6.148 |
| TAOK3    | Proliferation | 6.137 |
| VBP1     | Proliferation | 6.119 |
| TMEM218  | Proliferation | 6.101 |
| ZNF704   | Proliferation | 6.094 |
| UBA1     | Proliferation | 6.082 |
| C12ORF43 | Proliferation | 6.065 |
| KIF1B    | Proliferation | 6.064 |
| C1ORF50  | Proliferation | 6.064 |
| PUM2     | Proliferation | 6.059 |
| EIF1AX   | Proliferation | 6.046 |
| SDHB     | Proliferation | 6.044 |
| EIF3A    | Proliferation | 6.039 |
| KRAS     | Proliferation | 6.031 |
| PTPRK    | Proliferation | 6.021 |
| SERPINB6 | Proliferation | 6.018 |
| CCDC88A  | Proliferation | 5.986 |
| RAD21    | Proliferation | 5.982 |
| JMJD1C   | Proliferation | 5.977 |
| DRAP1    | Proliferation | 5.976 |
| MTRF1L   | Proliferation | 5.974 |
| ST13     | Proliferation | 5.968 |
| TTC39C   | Proliferation | 5.956 |
| TIMM23   | Proliferation | 5.952 |
| MRPS7    | Proliferation | 5.941 |
| MSRB2    | Proliferation | 5.934 |
| MTCH1    | Proliferation | 5.925 |
| PRKAR1B  | Proliferation | 5.923 |
| CD58     | Proliferation | 5.923 |
| CMIP     | Proliferation | 5.921 |
| DNTTIP2  | Proliferation | 5.920 |
| RBM14    | Proliferation | 5.875 |
| CFL1     | Proliferation | 5.872 |
| MED20    | Proliferation | 5.870 |
| RPL15    | Proliferation | 5.865 |
| TSPAN12  | Proliferation | 5.859 |
| PHACTR2  | Proliferation | 5.853 |
| C17ORF70 | Proliferation | 5.843 |
| GOSR2    | Proliferation | 5.833 |
| PITPNB   | Proliferation | 5.827 |
| CTDSP2   | Proliferation | 5.827 |
| ANKHD1   | Proliferation | 5.827 |
| C17ORF61 | Proliferation | 5.816 |
| NFAT5    | Proliferation | 5.812 |
| PTK2     | Proliferation | 5.808 |
| TLN1     | Proliferation | 5.803 |
| HSZFP36  | Proliferation | 5.787 |
| TERF2IP  | Proliferation | 5.767 |
| TMEM14A  | Proliferation | 5.762 |

|           |               |       |
|-----------|---------------|-------|
| UBQLN4    | Proliferation | 5.749 |
| CISD2     | Proliferation | 5.745 |
| NIN       | Proliferation | 5.728 |
| C14ORF32  | Proliferation | 5.721 |
| ZNF226    | Proliferation | 5.718 |
| LRP3      | Proliferation | 5.714 |
| CNTNAP1   | Proliferation | 5.703 |
| KIAA1539  | Proliferation | 5.699 |
| STAT6     | Proliferation | 5.689 |
| RPS6      | Proliferation | 5.687 |
| SNORA8    | Proliferation | 5.674 |
| TFAM      | Proliferation | 5.666 |
| FUBP3     | Proliferation | 5.666 |
| HNRPUL1   | Proliferation | 5.657 |
| BTN2A1    | Proliferation | 5.657 |
| FAF1      | Proliferation | 5.653 |
| FBXO22    | Proliferation | 5.645 |
| BAT2D1    | Proliferation | 5.643 |
| PBRM1     | Proliferation | 5.643 |
| C2ORF79   | Proliferation | 5.642 |
| MRPS6     | Proliferation | 5.641 |
| HES1      | Proliferation | 5.637 |
| SSU72     | Proliferation | 5.620 |
| MUTED     | Proliferation | 5.613 |
| DTX2      | Proliferation | 5.613 |
| FAM18B    | Proliferation | 5.610 |
| RPL23     | Proliferation | 5.605 |
| GOLGA8B   | Proliferation | 5.592 |
| STAT2     | Proliferation | 5.587 |
| CCND3     | Proliferation | 5.584 |
| CYB5R3    | Proliferation | 5.579 |
| LSM1      | Proliferation | 5.579 |
| HADHB     | Proliferation | 5.574 |
| C10ORF116 | Proliferation | 5.574 |
| MRS2      | Proliferation | 5.559 |
| HEBP2     | Proliferation | 5.552 |
| NDUFV3    | Proliferation | 5.551 |
| RBX1      | Proliferation | 5.544 |
| HIST1H2BC | Proliferation | 5.544 |
| ID2       | Proliferation | 5.543 |
| C10ORF78  | Proliferation | 5.529 |
| CCDC58    | Proliferation | 5.523 |
| MASP1     | Proliferation | 5.514 |
| UBE2E1    | Proliferation | 5.512 |
| ACACB     | Proliferation | 5.509 |
| RQCD1     | Proliferation | 5.506 |
| TSR1      | Proliferation | 5.503 |
| ZNF35     | Proliferation | 5.497 |
| STX8      | Proliferation | 5.474 |
| HBXIP     | Proliferation | 5.464 |

|              |              |        |
|--------------|--------------|--------|
| ZNF669       | Inflammation | 13.075 |
| PTPLAD2      | Inflammation | 12.636 |
| ORC6L        | Inflammation | 12.551 |
| LILRB3       | Inflammation | 12.460 |
| NAG18        | Inflammation | 11.844 |
| MEX3D        | Inflammation | 11.473 |
| ZNF674       | Inflammation | 11.405 |
| AIRE         | Inflammation | 10.945 |
| RAD51        | Inflammation | 10.905 |
| MCM8         | Inflammation | 10.876 |
| RNU1A3       | Inflammation | 10.854 |
| ZNF223       | Inflammation | 10.628 |
| LAIR1        | Inflammation | 10.442 |
| ABCB8        | Inflammation | 10.440 |
| SLC4A5       | Inflammation | 10.319 |
| TUBA1A       | Inflammation | 10.277 |
| LOC100190938 | Inflammation | 10.212 |
| FAM119A      | Inflammation | 10.191 |
| HFE          | Inflammation | 10.131 |
| CYCSL1       | Inflammation | 10.107 |
| DAPP1        | Inflammation | 10.062 |
| C14ORF85     | Inflammation | 9.995  |
| ZNF773       | Inflammation | 9.872  |
| SFRS13A      | Inflammation | 9.863  |
| PCDHB9       | Inflammation | 9.847  |
| NUP93        | Inflammation | 9.809  |
| FAM175A      | Inflammation | 9.791  |
| MOV10        | Inflammation | 9.693  |
| ZNF652       | Inflammation | 9.640  |
| PIGX         | Inflammation | 9.584  |
| KLHL28       | Inflammation | 9.572  |
| USP49        | Inflammation | 9.543  |
| EID2B        | Inflammation | 9.502  |
| ZNF430       | Inflammation | 9.471  |
| DENR         | Inflammation | 9.395  |
| PPA2         | Inflammation | 9.393  |
| ZNF273       | Inflammation | 9.312  |
| MGC16703     | Inflammation | 9.296  |
| MFSD6L       | Inflammation | 9.267  |
| SLC5A8       | Inflammation | 9.245  |
| PLA2G2D      | Inflammation | 9.238  |
| ZNF557       | Inflammation | 9.160  |
| C8ORF37      | Inflammation | 9.154  |
| RNU5D        | Inflammation | 9.119  |
| CNGB1        | Inflammation | 9.113  |
| NME3         | Inflammation | 9.078  |
| BMS1P5       | Inflammation | 9.046  |
| CREB1        | Inflammation | 8.934  |
| SHCBP1       | Inflammation | 8.934  |
| PACRGL       | Inflammation | 8.908  |

|          |              |       |
|----------|--------------|-------|
| LILRA6   | Inflammation | 8.776 |
| FLJ45256 | Inflammation | 8.721 |
| RNU6-15  | Inflammation | 8.691 |
| FAM40B   | Inflammation | 8.682 |
| QRFPR    | Inflammation | 8.668 |
| DUSP19   | Inflammation | 8.666 |
| CDAN1    | Inflammation | 8.619 |
| C2ORF69  | Inflammation | 8.580 |
| TMEM106A | Inflammation | 8.559 |
| CLCC1    | Inflammation | 8.436 |
| TERF1    | Inflammation | 8.418 |
| KIAA1143 | Inflammation | 8.345 |
| SNTN     | Inflammation | 8.341 |
| PNPT1    | Inflammation | 8.313 |
| SETD4    | Inflammation | 8.294 |
| NLRP8    | Inflammation | 8.291 |
| SLC4A2   | Inflammation | 8.285 |
| RPS2     | Inflammation | 8.280 |
| GGA1     | Inflammation | 8.266 |
| RAXL1    | Inflammation | 8.243 |
| TRIM16L  | Inflammation | 8.234 |
| PPP1R15B | Inflammation | 8.230 |
| PPM1K    | Inflammation | 8.178 |
| IL10     | Inflammation | 8.177 |
| SMCR5    | Inflammation | 8.174 |
| C1ORF150 | Inflammation | 8.169 |
| C8ORF45  | Inflammation | 8.144 |
| CUX1     | Inflammation | 8.121 |
| CEP27    | Inflammation | 8.072 |
| STAG3L1  | Inflammation | 8.045 |
| RAB4B    | Inflammation | 8.021 |
| RPS27L   | Inflammation | 7.980 |
| ZNF638   | Inflammation | 7.930 |
| CDC123   | Inflammation | 7.913 |
| MIA3     | Inflammation | 7.878 |
| C19ORF60 | Inflammation | 7.808 |
| HSPC268  | Inflammation | 7.764 |
| ERGIC1   | Inflammation | 7.728 |
| FAM39DP  | Inflammation | 7.705 |
| TSC22D4  | Inflammation | 7.695 |
| TMEM110  | Inflammation | 7.661 |
| MGAT1    | Inflammation | 7.656 |
| ATP6V0D1 | Inflammation | 7.627 |
| NUP214   | Inflammation | 7.614 |
| ZNHIT3   | Inflammation | 7.605 |
| CRAT     | Inflammation | 7.592 |
| NUBPL    | Inflammation | 7.587 |
| SLC35C2  | Inflammation | 7.558 |
| ZNF461   | Inflammation | 7.554 |
| NBPF15   | Inflammation | 7.537 |

|              |              |       |
|--------------|--------------|-------|
| MALAT1       | Inflammation | 7.517 |
| RAB11B       | Inflammation | 7.510 |
| PDRG1        | Inflammation | 7.476 |
| MSTO2P       | Inflammation | 7.469 |
| C11ORF63     | Inflammation | 7.456 |
| MLL4         | Inflammation | 7.454 |
| GSTTP2       | Inflammation | 7.417 |
| C11ORF83     | Inflammation | 7.414 |
| CABC1        | Inflammation | 7.399 |
| STAR         | Inflammation | 7.380 |
| RNU6-1       | Inflammation | 7.378 |
| ZNF595       | Inflammation | 7.372 |
| STAP2        | Inflammation | 7.319 |
| TRIM34       | Inflammation | 7.315 |
| LOC646996    | Inflammation | 7.268 |
| PRRG4        | Inflammation | 7.265 |
| AGXT2L2      | Inflammation | 7.260 |
| TRPM7        | Inflammation | 7.249 |
| RBL2         | Inflammation | 7.244 |
| PCTK1        | Inflammation | 7.231 |
| LOC100128288 | Inflammation | 7.216 |
| NOTCH2NL     | Inflammation | 7.214 |
| CHERP        | Inflammation | 7.207 |
| RNU1G2       | Inflammation | 7.206 |
| SPIN2B       | Inflammation | 7.199 |
| SIGLEC9      | Inflammation | 7.197 |
| EHMT1        | Inflammation | 7.176 |
| RPLP0P2      | Inflammation | 7.167 |
| LOC255167    | Inflammation | 7.167 |
| FAM108A3     | Inflammation | 7.146 |
| DCLRE1C      | Inflammation | 7.143 |
| IER3         | Inflammation | 7.142 |
| C9ORF80      | Inflammation | 7.116 |
| SC4MOL       | Inflammation | 7.087 |
| PIGW         | Inflammation | 7.085 |
| FXR1         | Inflammation | 7.024 |
| RNF126       | Inflammation | 6.995 |
| SUMO1        | Inflammation | 6.988 |
| SSB          | Inflammation | 6.954 |
| FLJ35390     | Inflammation | 6.911 |
| SDC1         | Inflammation | 6.909 |
| ZNF682       | Inflammation | 6.894 |
| KIAA1632     | Inflammation | 6.868 |
| LEP          | Inflammation | 6.861 |
| CCDC94       | Inflammation | 6.853 |
| ADRA2B       | Inflammation | 6.820 |
| RNY4         | Inflammation | 6.805 |
| RNY1         | Inflammation | 6.786 |
| ALPP         | Inflammation | 6.786 |
| KIAA0101     | Inflammation | 6.782 |

|              |              |       |
|--------------|--------------|-------|
| MAP3K7IP2    | Inflammation | 6.775 |
| KILLIN       | Inflammation | 6.774 |
| RNU5A        | Inflammation | 6.760 |
| HNRPH1       | Inflammation | 6.758 |
| COX7A2L      | Inflammation | 6.758 |
| PPP4R1       | Inflammation | 6.721 |
| MTFMT        | Inflammation | 6.720 |
| C2ORF14      | Inflammation | 6.698 |
| KEAP1        | Inflammation | 6.681 |
| SLC30A6      | Inflammation | 6.672 |
| SNORD11B     | Inflammation | 6.654 |
| C7ORF64      | Inflammation | 6.654 |
| NBPF1        | Inflammation | 6.651 |
| EIF3B        | Inflammation | 6.633 |
| SNAPC1       | Inflammation | 6.627 |
| UBTF         | Inflammation | 6.610 |
| ZNF787       | Inflammation | 6.598 |
| UPLP         | Inflammation | 6.593 |
| HMG3         | Inflammation | 6.583 |
| SKAP2        | Inflammation | 6.558 |
| HNRNPA1L2    | Inflammation | 6.535 |
| RGS10        | Inflammation | 6.533 |
| LOC100190986 | Inflammation | 6.529 |
| SGPL1        | Inflammation | 6.528 |
| CCT6A        | Inflammation | 6.517 |
| ZC3HAV1L     | Inflammation | 6.502 |
| AFF1         | Inflammation | 6.488 |
| UTP20        | Inflammation | 6.460 |
| LRP10        | Inflammation | 6.460 |
| PARP10       | Inflammation | 6.456 |
| FAM84A       | Inflammation | 6.455 |
| KCNH6        | Inflammation | 6.448 |
| HPR          | Inflammation | 6.437 |
| N4BP2        | Inflammation | 6.433 |
| TBCD         | Inflammation | 6.428 |
| ZNF48        | Inflammation | 6.410 |
| RNU4-1       | Inflammation | 6.403 |
| PSIP1        | Inflammation | 6.382 |
| GCHFR        | Inflammation | 6.377 |
| MFSD2        | Inflammation | 6.367 |
| GYG2         | Inflammation | 6.349 |
| TXNDC11      | Inflammation | 6.321 |
| FADS2        | Inflammation | 6.307 |
| ADAM15       | Inflammation | 6.289 |
| LOC441150    | Inflammation | 6.275 |
| LOC260339    | Inflammation | 6.269 |
| POGZ         | Inflammation | 6.256 |
| BRIP1        | Inflammation | 6.251 |
| LOC440926    | Inflammation | 6.251 |
| PEAR1        | Inflammation | 6.234 |



|           |              |       |
|-----------|--------------|-------|
| NUPR1     | Inflammation | 6.227 |
| THAP4     | Inflammation | 6.225 |
| FAM3C     | Inflammation | 6.217 |
| RABAC1    | Inflammation | 6.201 |
| DPP9      | Inflammation | 6.180 |
| SPTLC1    | Inflammation | 6.177 |
| RNU1F1    | Inflammation | 6.174 |
| TBC1D2B   | Inflammation | 6.174 |
| TFAMP1    | Inflammation | 6.173 |
| SNORD26   | Inflammation | 6.157 |
| LYL1      | Inflammation | 6.137 |
| SLC25A16  | Inflammation | 6.136 |
| HNRPK     | Inflammation | 6.129 |
| C19ORF24  | Inflammation | 6.127 |
| CCDC85B   | Inflammation | 6.126 |
| CHRM2     | Inflammation | 6.125 |
| ATG3      | Inflammation | 6.118 |
| HIST2H3A  | Inflammation | 6.113 |
| PDCD7     | Inflammation | 6.108 |
| MCPH1     | Inflammation | 6.098 |
| FBXO18    | Inflammation | 6.095 |
| CFLAR     | Inflammation | 6.088 |
| KLK7      | Inflammation | 6.069 |
| GIYD1     | Inflammation | 6.068 |
| KRCC1     | Inflammation | 6.059 |
| PHF1      | Inflammation | 6.048 |
| SDCCAG3   | Inflammation | 6.048 |
| FTSJ1     | Inflammation | 6.047 |
| MED15     | Inflammation | 6.045 |
| PPP2R5D   | Inflammation | 6.029 |
| ZNF358    | Inflammation | 6.024 |
| RNU1-5    | Inflammation | 6.019 |
| BMP4      | Inflammation | 6.011 |
| METRNL    | Inflammation | 6.010 |
| ZFP64     | Inflammation | 6.008 |
| TRADD     | Inflammation | 6.008 |
| NAT12     | Inflammation | 6.007 |
| PHC2      | Inflammation | 5.998 |
| LOC399744 | Inflammation | 5.991 |
| GLI2      | Inflammation | 5.990 |
| MAGED2    | Inflammation | 5.981 |
| GLRX2     | Inflammation | 5.980 |
| MTDH      | Inflammation | 5.966 |
| C1RL      | Inflammation | 5.950 |
| SURF2     | Inflammation | 5.941 |
| PSMB5     | Inflammation | 5.920 |
| EPS8L2    | Inflammation | 5.919 |
| NUDT4P1   | Inflammation | 5.912 |
| GLTSCR1   | Inflammation | 5.907 |
| FAM176B   | Inflammation | 5.899 |

|         |              |       |
|---------|--------------|-------|
| UBE2T   | Inflammation | 5.871 |
| SNORA5B | Inflammation | 5.847 |
| ZNF205  | Inflammation | 5.836 |
| DOPEY2  | Inflammation | 5.836 |
| SNORD3D | Inflammation | 5.813 |
| PODXL   | Inflammation | 5.795 |
| RNU1-3  | Inflammation | 5.758 |
| TIGD2   | Inflammation | 5.757 |
| NFE2L1  | Inflammation | 5.751 |
| RBM9    | Inflammation | 5.741 |
| FKTN    | Inflammation | 5.707 |
| TEX11   | Inflammation | 5.648 |
| MLLT1   | Inflammation | 5.546 |

**Supplementary Table 4.** FLC immunohistochemistry grading (n=42)

| <b>Marker</b>     | <b>pRPS6</b> |     | <b>EGFR</b> |     | <b>HepPar1</b> |     | <b>CK7</b> |     | <b>CK19</b> |     | <b>EpCAM</b> |     |
|-------------------|--------------|-----|-------------|-----|----------------|-----|------------|-----|-------------|-----|--------------|-----|
| <b>Difuse</b>     | 11           | 26% | 29          | 69% | 39             | 93% | 35         | 83% | 1           | 2%  | 2            | 5%  |
| <b>Focal</b>      | 11           | 26% | 3           | 7%  | 2              | 5%  | 3          | 7%  | 7           | 17% | 8            | 19% |
| <b>Few cels</b>   | 3            | 7%  | 5           | 12% | 0              | 0%  | 0          | 0%  | 1           | 2%  | 0            | 0%  |
| <b>Positivity</b> | 25           | 60% | 37          | 88% | 41             | 98% | 38         | 90% | 9           | 21% | 10           | 24% |

Supplementary Table S. Chromosomal arm-level genomic copy number alterations

| Chr.Arm | FLC01 | FLC02  | FLC08 | FLC22 | FLC39 | FLC41 | FLC05  | FLC12 | FLC13 | FLC14 | FLC17 | FLC20 | FLC33 | FLC32 | FLC35  | FLC43  | FLC47  | FLC49 | FLC50 | FLC53 | FLC54  | FLC56  | FLC58  | FLC59  | FLC60  | FLC33 | FLC03 | FLC11 | FLC45 | FLC48  | FLC51  | FLC57  |   |   |
|---------|-------|--------|-------|-------|-------|-------|--------|-------|-------|-------|-------|-------|-------|-------|--------|--------|--------|-------|-------|-------|--------|--------|--------|--------|--------|-------|-------|-------|-------|--------|--------|--------|---|---|
| 1p      | 0     | 0      | 0     | 0     | 0     | 0     | 0      | 0     | 0     | 0     | 0     | 0     | 0     | 0     | 0      | 0      | 0      | 0     | 0     | 0     | 0      | 0      | 0      | 0      | 0      | 0     | 0     | 0     | 0     | 0      | 0      | 0      |   |   |
| 1q      | 0     | 0      | 0     | 0     | 0     | 0     | 0      | 0     | 0     | 0     | 0     | 0     | 0     | 0     | 0      | 0      | 0      | 0.171 | 0     | 0     | 0      | 0      | 0      | 0      | 0      | 0     | 0     | 0     | 0     | 0      | 0.161  | 0      | 0 |   |
| 2p      | 0     | 0      | 0     | 0     | 0     | 0     | 0      | 0     | 0     | 0     | 0     | 0     | 0     | 0     | 0      | 0      | 0      | 0     | 0     | 0     | 0      | 0      | 0      | 0      | 0      | 0     | 0     | 0     | 0     | 0      | 0      | 0      |   |   |
| 2q      | 0     | 0      | 0     | 0     | 0     | 0     | 0      | 0     | 0     | 0     | 0     | 0     | 0     | 0     | 0      | 0      | 0      | 0     | 0     | 0     | 0      | 0      | 0      | 0      | 0      | 0     | 0     | 0     | 0     | 0      | 0      | 0      |   |   |
| 3p      | 0     | 0      | 0     | 0     | 0     | 0     | 0      | 0     | 0     | 0     | 0     | 0     | 0     | 0     | 0      | 0      | 0      | 0     | 0     | 0     | 0      | 0      | 0      | 0      | 0      | 0     | 0     | 0     | 0     | 0      | 0      | 0      |   |   |
| 3q      | 0     | 0      | 0     | 0     | 0     | 0     | 0      | 0     | 0     | 0     | 0     | 0     | 0     | 0     | 0      | 0      | 0      | 0     | 0     | 0     | 0      | 0      | 0      | 0      | 0      | 0     | 0     | 0     | 0     | 0      | 0      | 0      |   |   |
| 4p      | 0     | 0      | 0     | 0     | 0     | 0     | -0.159 | 0     | 0     | 0     | 0     | 0     | 0     | 0     | 0      | 0      | 0      | -0.2  | 0     | 0     | 0      | 0      | 0      | 0      | 0      | 0     | 0     | 0     | 0     | 0      | 0      | 0      |   |   |
| 4q      | 0     | 0      | 0     | 0     | 0     | 0     | -0.159 | 0     | 0     | 0     | 0     | 0     | 0     | 0     | 0      | 0      | 0      | -0.2  | 0     | 0     | 0      | 0      | 0      | 0      | 0      | 0     | 0     | 0     | 0     | 0      | 0      | 0      |   |   |
| 5p      | 0     | 0      | 0.204 | 0     | 0     | 0     | 0      | 0     | 0     | 0     | 0     | 0     | 0     | 0     | 0      | 0      | 0      | 0     | 0     | 0     | 0      | 0      | 0      | 0      | 0      | 0     | 0     | 0     | 0     | 0      | 0      | 0      |   |   |
| 5q      | 0     | 0      | 0     | 0     | 0     | 0     | 0      | 0     | 0     | 0     | 0     | 0     | 0     | 0     | 0      | 0      | 0      | 0     | 0     | 0     | 0      | 0      | 0      | 0      | 0      | 0     | 0     | 0     | 0     | 0      | 0      | 0      |   |   |
| 6p      | 0     | 0      | 0     | 0     | 0.17  | 0     | 0      | 0     | 0     | 0     | 0     | 0     | 0     | 0     | 0      | 0      | 0      | 0     | 0     | 0     | 0      | 0      | 0      | 0      | 0      | 0     | 0     | 0     | 0     | 0      | 0      | 0      |   |   |
| 6q      | 0     | 0      | 0     | 0     | 0     | 0     | 0      | 0     | 0     | 0     | 0     | 0     | 0     | 0     | 0      | 0      | 0      | 0     | 0     | 0     | 0      | 0      | 0      | 0      | 0      | 0     | 0     | 0     | 0     | 0      | 0      | 0      |   |   |
| 7p      | 0     | 0      | 0     | 0     | 0     | 0     | 0      | 0     | 0     | 0     | 0     | 0     | 0     | 0     | 0      | 0      | 0      | 0     | 0     | 0     | 0      | 0      | 0      | 0      | 0      | 0     | 0     | 0     | 0     | 0      | 0      | 0      |   |   |
| 7q      | 0     | 0      | 0     | 0     | 0     | 0     | 0      | 0     | 0     | 0     | 0     | 0     | 0     | 0     | 0      | 0      | 0      | 0     | 0     | 0     | 0      | 0      | 0      | 0      | 0      | 0     | 0     | 0     | 0     | 0      | 0      | 0      |   |   |
| 8p      | 0     | 0      | 0     | 0     | 0     | 0     | 0      | 0     | 0     | 0     | 0     | 0     | 0     | 0     | 0      | 0      | 0      | 0     | 0     | 0     | 0      | 0      | 0      | 0      | 0      | 0     | 0     | 0     | 0     | 0      | 0      | 0      |   |   |
| 8q      | 0     | 0      | 0     | 0     | 0     | 0     | 0      | 0     | 0     | 0     | 0     | 0     | 0     | 0     | 0      | 0      | 0      | 0     | 0     | 0     | 0      | 0      | 0      | 0      | 0      | 0     | 0     | 0     | 0     | 0      | 0.168  | 0      | 0 |   |
| 9p      | 0     | 0      | 0     | 0     | 0     | 0     | 0      | 0     | 0     | 0     | 0     | 0     | 0     | 0     | 0      | 0      | 0      | 0     | 0     | 0     | 0      | 0      | 0      | 0      | 0      | 0     | 0     | 0     | 0     | 0      | 0      | 0      |   |   |
| 9q      | 0     | 0      | 0     | 0     | 0     | 0     | 0      | 0     | 0     | 0     | 0     | 0     | 0     | 0     | 0      | 0      | 0      | 0     | 0     | 0     | 0      | 0      | 0      | 0      | 0      | 0     | 0     | 0     | 0     | 0      | 0      | 0      |   |   |
| 10p     | 0     | 0      | 0     | 0     | 0     | 0     | 0      | 0     | 0     | 0     | 0     | 0     | 0     | 0     | 0      | 0      | 0      | 0     | 0     | 0     | 0      | 0      | 0      | 0      | 0      | 0     | 0     | 0     | 0     | 0      | 0      | 0      |   |   |
| 10q     | 0     | 0      | 0     | 0     | 0     | 0     | 0      | 0     | 0     | 0     | 0     | 0     | 0     | 0     | 0      | 0      | 0      | 0     | 0     | 0     | 0      | 0      | 0      | 0      | 0      | 0     | 0     | 0     | 0     | 0      | 0      | 0      |   |   |
| 11p     | 0     | 0      | 0     | 0     | 0     | 0     | 0      | 0     | 0     | 0     | 0     | 0     | 0     | 0     | 0      | 0      | 0      | 0     | 0     | 0     | 0      | 0      | 0      | 0      | 0      | 0     | 0     | 0     | 0     | 0      | 0      | 0      |   |   |
| 11q     | 0     | 0      | 0     | 0     | 0     | 0     | -0.201 | 0     | 0     | 0     | 0     | 0     | 0     | 0     | 0      | 0      | 0      | 0     | 0     | 0     | 0      | 0      | 0      | 0      | 0      | 0     | 0     | 0     | 0     | 0      | 0      | 0      |   |   |
| 12p     | 0     | 0      | 0     | 0     | 0     | 0     | 0      | 0     | 0     | 0     | 0     | 0     | 0     | 0     | 0      | 0      | 0      | 0     | 0     | 0     | 0      | 0      | 0      | 0      | 0      | 0     | 0     | 0     | 0     | 0      | 0      | 0      |   |   |
| 12q     | 0     | 0      | 0     | 0     | 0     | 0     | 0      | 0     | 0     | 0     | 0     | 0     | 0     | 0     | 0      | 0      | 0      | 0     | 0     | 0     | 0      | 0      | 0      | 0      | 0      | 0     | 0     | 0     | 0     | 0      | 0      | 0      |   |   |
| 13p     | 0     | 0      | 0     | 0     | 0     | 0     | 0      | 0     | 0     | 0     | 0     | 0     | 0     | 0     | 0      | -0.153 | 0      | 0     | 0     | 0     | 0      | 0      | 0      | 0      | 0      | 0     | 0     | 0     | 0     | 0      | 0      | 0      |   |   |
| 13q     | 0     | 0      | 0     | 0     | 0     | 0     | 0      | 0     | 0     | 0     | 0     | 0     | 0     | 0     | 0      | 0      | 0      | 0     | 0     | 0     | 0      | 0      | 0      | 0      | 0      | 0     | 0     | 0     | 0     | 0      | 0      | 0      |   |   |
| 14p     | 0     | 0      | 0     | 0     | 0     | 0     | 0      | 0     | 0     | 0     | 0     | 0     | 0     | 0     | 0      | 0      | 0      | 0     | 0     | 0     | 0      | 0      | 0      | 0      | 0      | 0     | 0     | 0     | 0     | 0      | 0      | 0      |   |   |
| 14q     | 0     | 0      | 0     | 0     | 0     | 0     | 0      | 0     | 0     | 0     | 0     | 0     | 0     | 0     | 0      | 0      | 0      | 0     | 0     | 0     | 0      | 0      | 0      | 0      | 0      | 0     | 0     | 0     | 0     | 0      | 0      | 0      |   |   |
| 15p     | 0     | 0      | 0     | 0     | 0     | 0     | 0      | 0     | 0     | 0     | 0     | 0     | 0     | 0     | 0      | 0      | 0      | 0     | 0     | 0.17  | 0      | 0      | 0      | 0      | 0      | 0     | 0     | 0     | 0     | 0      | 0      | -0.161 | 0 | 0 |
| 15q     | 0     | 0      | 0     | 0     | 0     | 0     | 0      | 0     | 0     | 0     | 0     | 0     | 0     | 0     | 0      | 0      | 0      | 0     | 0     | 0     | 0      | 0      | 0      | 0      | 0      | 0     | 0     | 0     | 0     | 0      | 0      | 0      |   |   |
| 16p     | 0     | 0      | 0     | 0     | 0     | 0     | 0      | 0     | 0     | 0     | 0     | 0     | 0     | 0     | 0      | 0      | 0      | 0     | 0.17  | 0     | 0      | 0      | 0      | 0      | 0      | 0     | 0     | 0     | 0     | 0      | 0      | -0.161 | 0 | 0 |
| 16q     | 0     | 0      | 0     | 0     | 0     | 0     | 0      | 0     | 0     | 0     | 0     | 0     | 0     | 0     | 0      | 0      | 0      | 0     | 0     | 0     | 0      | 0      | 0      | 0      | 0      | 0     | 0     | 0     | 0     | 0      | 0      | 0      | 0 |   |
| 17p     | 0     | 0      | 0     | 0     | 0     | 0     | 0      | 0     | 0     | 0     | 0     | 0     | 0     | 0     | 0      | 0      | 0      | 0     | 0     | 0     | -0.193 | 0      | 0      | -0.152 | 0      | 0     | 0     | 0     | 0     | 0      | 0      | -0.268 | 0 | 0 |
| 17q     | 0     | 0      | 0     | 0     | 0     | 0     | 0      | 0     | 0     | 0     | 0     | 0     | 0     | 0     | 0      | 0      | 0      | 0     | 0     | 0     | 0      | 0      | 0      | 0      | 0      | 0     | 0     | 0     | 0     | 0      | 0      | 0      | 0 |   |
| 18p     | 0     | 0      | 0     | 0     | 0     | 0     | 0      | 0     | 0     | 0     | 0     | 0     | 0     | 0     | 0      | 0      | 0      | 0     | 0     | 0     | 0      | 0      | 0      | 0      | 0      | 0     | 0     | 0     | 0     | 0      | 0      | 0      | 0 |   |
| 18q     | 0     | 0      | 0     | 0     | 0     | 0     | 0      | 0     | 0     | 0     | 0     | 0     | 0     | 0     | 0      | 0      | 0      | 0     | 0     | 0     | 0      | 0      | 0      | 0      | 0      | 0     | 0     | 0     | 0     | 0      | 0      | 0      | 0 |   |
| 19p     | 0.203 | -0.153 | 0     | 0     | 0     | 0     | 0      | 0     | 0     | 0     | 0     | 0     | 0     | 0     | -0.277 | 0      | -0.302 | 0.32  | 0.214 | 0     | -0.344 | 0      | -0.168 | -0.306 | -0.181 | 0     | 0     | 0     | 0     | 0      | -0.427 | 0      | 0 |   |
| 19q     | 0.203 | -0.153 | 0     | 0     | 0     | 0     | 0      | 0     | 0     | 0     | 0     | 0     | 0     | 0     | -0.277 | 0      | -0.302 | 0.32  | 0.214 | 0     | -0.344 | 0      | -0.168 | -0.306 | -0.181 | 0     | 0     | 0     | 0     | 0      | -0.427 | 0      | 0 |   |
| 20p     | 0     | 0      | 0     | 0     | 0     | 0     | 0      | 0     | 0     | 0     | 0     | 0     | 0     | 0     | 0      | 0      | 0      | 0     | 0     | 0     | 0      | 0      | 0      | 0      | 0      | 0     | 0     | 0     | 0     | 0      | 0      | 0      | 0 |   |
| 20q     | 0     | 0      | 0     | 0     | 0     | 0     | 0      | 0     | 0     | 0     | 0     | 0     | 0     | 0     | 0      | 0      | 0      | 0     | 0     | 0     | 0      | 0      | 0      | 0      | 0      | 0     | 0     | 0     | 0     | 0      | 0      | 0      | 0 |   |
| 21p     | 0     | 0      | 0     | 0     | 0     | 0     | 0      | 0     | 0     | 0     | 0     | 0     | 0     | 0     | 0      | 0      | 0      | 0     | 0     | 0     | 0      | 0      | 0      | 0      | 0      | 0     | 0     | 0     | 0     | 0      | 0      | 0      | 0 |   |
| 21q     | 0     | 0      | 0     | 0     | 0     | 0     | 0      | 0     | 0     | 0     | 0     | 0     | 0     | 0     | 0      | 0      | 0      | 0     | 0     | 0     | 0      | 0      | 0      | 0      | 0      | 0     | 0     | 0     | 0     | 0      | 0      | 0      | 0 |   |
| 22q     | 0     | -0.243 | 0     | 0     | 0     | 0     | 0.211  | 0     | 0     | 0     | 0     | 0     | 0     | 0     | -0.169 | 0      | -0.278 | 0.168 | 0     | 0     | -0.351 | -0.386 | 0      | -0.389 | -0.197 | 0     | 0     | 0     | 0     | -0.394 | 0      | 0      | 0 |   |

Supplementary Table 6. FLC molecular subclass of chromosomal altered samples

| Alteration | Chr.   | Patients involved |               | Molecular Subclass (%) |             |                        |      | p value  |  |
|------------|--------|-------------------|---------------|------------------------|-------------|------------------------|------|----------|--|
|            |        | #, (%)            | Proliferation | Inflammation           | Unannotated | No transcriptomic data |      |          |  |
| Broad      | Gains  | 1q                | 2, (6)        | 50                     |             |                        | 50   |          |  |
|            |        | 19                | 3, (9)        | 33                     | 33          | 33                     |      |          |  |
|            |        | 22q               | 2, (6)        | 100                    |             |                        |      |          |  |
|            | Losses | 4                 | 2, (6)        | 100                    |             |                        |      |          |  |
|            |        | 17                | 3, (9)        |                        | 66          |                        | 33   |          |  |
|            |        | 19                | 8, (25)       | 25                     | 50          | 12.5                   | 12.5 |          |  |
|            |        | 20                | 2, (6)        |                        | 50          |                        | 50   |          |  |
|            |        | 22q               | 8, (25)       | 25                     | 50          | 12.5                   | 12.5 |          |  |
|            | Focal  | Gains             | 6q27          | 2, (6)                 | 100         |                        |      |          |  |
|            |        |                   | 8q24.3        | 4, (12.5)              | 25          |                        | 50   | 25       |  |
|            |        |                   | 17q25.3       | 2, (6)                 | 50          | 50                     |      |          |  |
|            |        | Losses            | 1p36.33       | 3, (9)                 | 33          |                        | 66   |          |  |
|            |        |                   | 8p21.3        | 2, (6)                 |             | 50                     | 50   |          |  |
| 11p15.5    |        |                   | 1, (3)        | 100                    |             |                        |      |          |  |
| 19p13.3    |        |                   | 9, (28)       | 22                     | 56          | 11                     | 11   | p=0.0151 |  |
| 19p13.12   |        |                   | 9, (28)       | 22                     | 56          | 11                     | 11   | p=0.0151 |  |
| 22q13.32   |        |                   | 8, (5)        | 25                     | 50          | 12.5                   | 12.5 |          |  |

ACCEPTED MANUSCRIPT

Supplementary Table 7. Focal amplifications in FLC samples

|                                       |                         |                          |                          |
|---------------------------------------|-------------------------|--------------------------|--------------------------|
| <b>cytoband</b>                       | 17q25.3                 | 6q27                     | 8q24.3                   |
| <b>q value</b>                        | 0.004019                | 0.018965                 | 0.22437                  |
| <b>residual q value</b>               | 0.004019                | 0.018965                 | 0.22437                  |
| <b>wide peak boundaries</b>           | chr17:77364582-77395624 | chr6:168352106-168552064 | chr8:145919127-146364022 |
| <b>total number of affected genes</b> | 1                       | 4                        | 12                       |
| <b>genes in wide peak</b>             | RBFOX3                  | KIF25                    | RPL8                     |
|                                       |                         | MLLT4                    | ZNF7                     |
|                                       |                         | FRMD1                    | ZNF16                    |
|                                       |                         | HGC6.3                   | COMMD5                   |
|                                       |                         |                          | ZNF250                   |
|                                       |                         |                          | C8orf33                  |
|                                       |                         |                          | ZNF34                    |
|                                       |                         |                          | ZNF251                   |
|                                       |                         |                          | ZNF252                   |
|                                       |                         |                          | TMED10P1                 |
|                                       |                         |                          | C8orf77                  |
|                                       |                         |                          | ZNF517                   |

| cytoband                       | 1p36.33        | 8p21.3                 | 11p15.5         | 19p13.12                | 19p13.3         | 22q13.32                |
|--------------------------------|----------------|------------------------|-----------------|-------------------------|-----------------|-------------------------|
| q value                        | 0.22421        | 0.22421                | 0.22421         | 0.22421                 | 0.22421         | 0.22421                 |
| residual q value               | 0.22421        | 0.22421                | 0.22421         | 0.22421                 | 0.22421         | 0.22421                 |
| wide peak boundaries           | chr1:1-1388267 | chr8:21888571-22058121 | chr11:1-3009437 | chr19:14276712-14623757 | chr19:1-4110491 | chr22:48929172-49004394 |
| Total number of affected genes | 56             | 10                     | 104             | 7                       | 150             | 2                       |
| genes in wide peak             | hsa-mir-429    | BMP1                   | hsa-mir-483     | CD97                    | hsa-mir-637     | FAM19A5                 |
|                                | hsa-mir-1302-2 | EPB49                  | hsa-mir-675     | PKN1                    | hsa-mir-4321    | LOC284933               |
|                                | DVL1           | SFTPC                  | hsa-mir-4298    | PTGER1                  | hsa-mir-1909    |                         |
|                                | SCNN1D         | FGF17                  | hsa-mir-210     | DDX39A                  | hsa-mir-3187    |                         |
|                                | TNFRSF4        | NPM2                   | AP2A2           | GIPC1                   | hsa-mir-1302-11 |                         |
|                                | TNFRSF18       | HR                     | ASCL2           | LPHN1                   | AES             |                         |
|                                | ISG15          | FAM160B2               | CD81            | LOC100507373            | AMH             |                         |
|                                | NOC2L          | NUDT18                 | CD151           |                         | ATP5D           |                         |
|                                | OR4F3          | REEP4                  | CDKN1C          |                         | AZU1            |                         |
|                                | SDF4           | LG13                   | CTSD            |                         | HCN2            |                         |
|                                | MXRA8          |                        | DRD4            |                         | BSG             |                         |
|                                | CPSF3L         |                        | DUSP8           |                         | CDC34           |                         |
|                                | C1orf159       |                        | HRAS            |                         | CIRBP           |                         |
|                                | AURKAIP1       |                        | IGF2            |                         | CNN2            |                         |
|                                | MRPL20         |                        | INS             |                         | CSNK1G2         |                         |
|                                | HES4           |                        | IRF7            |                         | DAPK3           |                         |
|                                | VWA1           |                        | KCNQ1           |                         | CFD             |                         |
|                                | OR4F5          |                        | LSP1            |                         | ARID3A          |                         |
|                                | LINC00115      |                        | MUC2            |                         | EEF2            |                         |
|                                | GLTPD1         |                        | MUC6            |                         | EFNA2           |                         |
|                                | OR4F16         |                        | NAP1L4          |                         | ELANE           |                         |
|                                | CCNL2          |                        | SLC22A18        |                         | GAMT            |                         |
|                                | TAS1R3         |                        | SLC22A18AS      |                         | GNA11           |                         |
|                                | PLEKHN1        |                        | POLR2L          |                         | GNA15           |                         |
|                                | C1orf170       |                        | PSMD13          |                         | GNG7            |                         |
|                                | ACAP3          |                        | RNH1            |                         | MKNK2           |                         |
|                                | UBE2J2         |                        | MRPL23          |                         | GPX4            |                         |
|                                | PUSL1          |                        | RPLP2           |                         | GZMM            |                         |
|                                | B3GALT6        |                        | SCT             |                         | MATK            |                         |
|                                | SAMD11         |                        | TALDO1          |                         | GADD45B         |                         |
|                                | LOC148413      |                        | TH              |                         | NFIC            |                         |
|                                | ATAD3C         |                        | TSPAN4          |                         | OAZ1            |                         |
|                                | LOC254099      |                        | TNNI2           |                         | PALM            |                         |
|                                | TLL10          |                        | TNNT3           |                         | POLR2E          |                         |
|                                | FAM41C         |                        | PHLDA2          |                         | POLRMT          |                         |
|                                | KLHL17         |                        | RASSF7          |                         | MAP2K2          |                         |
|                                | AGRN           |                        | IFITM1          |                         | PRTN3           |                         |
|                                | FAM132A        |                        | BRSK2           |                         | PTBP1           |                         |
|                                | RNF223         |                        | TSPAN32         |                         | RPS15           |                         |
|                                | MIR200A        |                        | TSSC4           |                         | SGTA            |                         |
|                                | MIR200B        |                        | IFITM3          |                         | STK11           |                         |
|                                | ANKRD65        |                        | DEAF1           |                         | TBXA2R          |                         |
|                                | MIR429         |                        | IFITM2          |                         | TCF3            |                         |
|                                | FAM138F        |                        | KCNQ1OT1        |                         | THOP1           |                         |
|                                | LOC643837      |                        | PKP3            |                         | TLE2            |                         |
|                                | TMEM88B        |                        | SIRT3           |                         | MADCAM1         |                         |
|                                | FAM138A        |                        | C11orf21        |                         | SF3A2           |                         |
|                                | WASH7P         |                        | TRPM5           |                         | PPAP2C          |                         |
|                                | LOC729737      |                        | IGF2-AS1        |                         | S1PR4           |                         |
|                                | OR4F29         |                        | BET1L           |                         | AP3D1           |                         |
|                                | LOC100130417   |                        | CEND1           |                         | APBA3           |                         |
|                                | LOC100132062   |                        | CDHR5           |                         | MED16           |                         |
|                                | LOC100132287   |                        | TOLLIP          |                         | FSTL3           |                         |
|                                | LOC100133331   |                        | PIDD            |                         | APC2            |                         |



|              |              |          |
|--------------|--------------|----------|
| DDX11L1      | KCNQ1DN      | ABCA7    |
| LOC100288069 | PNPLA2       | HMG20B   |
|              | PHRF1        | UQCR11   |
|              | SIGIRR       | SBNO2    |
|              | RIC8A        | ZFR2     |
|              | EPS8L2       | PIP5K1C  |
|              | CHID1        | HMHA1    |
|              | SLC25A22     | SHC2     |
|              | ATHL1        | TIMM13   |
|              | PTDSS2       | DAZAP1   |
|              | MOB2         | SNORD37  |
|              | SYT8         | FGF22    |
|              | ODF3         | TJP3     |
|              | LRRC56       | ITGB1BP3 |
|              | LOC143666    | SLC39A3  |
|              | SCGB1C1      | THEG     |
|              | NLRP6        | ZBTB7A   |
|              | NS3BP        | FZR1     |
|              | LOC255512    | PIAS4    |
|              | C11orf35     | LSM7     |
|              | H19          | MBD3     |
|              | EFCAB4A      | MIER2    |
|              | TMEM80       | PCSK4    |
|              | ANO9         | C19orf24 |
|              | LOC338651    | PLEKHJ1  |
|              | B4GALNT4     | BTBD2    |
|              | PDDC1        | RNF126   |
|              | KRTAP5-1     | NCLN     |
|              | KRTAP5-3     | SPPL2B   |
|              | KRTAP5-4     | WDR18    |
|              | IFITM5       | REXO1    |
|              | FAM99A       | ZNF77    |
|              | IFITM10      | C19orf29 |
|              | MIR210       | CELF5    |
|              | KRTAP5-5     | TLE6     |
|              | KRTAP5-2     | LPPR3    |
|              | KRTAP5-6     | ZNF556   |
|              | MIR483       | OR4F17   |
|              | SNORA52      | FAM108A1 |
|              | LOC653486    | DOHH     |
|              | SNORA54      | KLF16    |
|              | INS-IGF2     | DOT1L    |
|              | MUC5B        | KISS1R   |
|              | MIR675       | LMNB2    |
|              | FAM99B       | RAX2     |
|              | LOC100133161 | MUM1     |
|              | MRPL23-AS1   | ATCAY    |
|              | MIR4298      | MIDN     |
|              | MIR210HG     | R3HDM4   |
|              | MIR4686      | C19orf6  |
|              |              | TPGS1    |
|              |              | REEP6    |
|              |              | IZUMO4   |
|              |              | SCAMP4   |
|              |              | ADAT3    |
|              |              | ZNF554   |
|              |              | GRIN3B   |
|              |              | MRPL54   |
|              |              | ZNF57    |
|              |              | JSRP1    |
|              |              | MOB3A    |
|              |              | MFSD12   |
|              |              | GIPC3    |

|  |  |  |  |              |  |
|--|--|--|--|--------------|--|
|  |  |  |  | C19orf21     |  |
|  |  |  |  | PLK5         |  |
|  |  |  |  | C2CD4C       |  |
|  |  |  |  | CIRBP-AS1    |  |
|  |  |  |  | C19orf25     |  |
|  |  |  |  | ATP8B3       |  |
|  |  |  |  | DIRAS1       |  |
|  |  |  |  | ZNF555       |  |
|  |  |  |  | C19orf26     |  |
|  |  |  |  | CSNK1G2-AS1  |  |
|  |  |  |  | C19orf77     |  |
|  |  |  |  | ODF3L2       |  |
|  |  |  |  | ADAMTSL5     |  |
|  |  |  |  | TMPRSS9      |  |
|  |  |  |  | NDUFS7       |  |
|  |  |  |  | C19orf35     |  |
|  |  |  |  | WASH5P       |  |
|  |  |  |  | ONECUT3      |  |
|  |  |  |  | MEX3D        |  |
|  |  |  |  | FLJ45445     |  |
|  |  |  |  | PRSS57       |  |
|  |  |  |  | C19orf29-AS1 |  |
|  |  |  |  | FAM138F      |  |
|  |  |  |  | LINGO3       |  |
|  |  |  |  | FAM138A      |  |
|  |  |  |  | MIR637       |  |
|  |  |  |  | C19orf71     |  |
|  |  |  |  | LOC100288123 |  |
|  |  |  |  | MIR1909      |  |
|  |  |  |  | MIR1227      |  |
|  |  |  |  | MIR3187      |  |
|  |  |  |  | MIR4321      |  |
|  |  |  |  | MIR4745      |  |

**Supplementary Table 9.** Chromosomal arm-level genomic copy number alterations of the Fresh Frozen cohort

| Alteration               | chr.arm | 92T | 187T | 232T | 255T | 334T | 406T | 407T | 410T | 1310T | total | %  | 93T* | 337T* |
|--------------------------|---------|-----|------|------|------|------|------|------|------|-------|-------|----|------|-------|
| <b>Gains</b>             | 8q      | 1   | 0    | 0    | 1    | 0    | 0    | 0    | 0    | 0     | 2     | 22 | 0    | 1     |
|                          | 15q     | 1   | 0    | 0    | 0    | 0    | 0    | 0    | 0    | 0     | 1     | 11 | 0    | 0     |
|                          | 20q     | 1   | 0    | 0    | 0    | 0    | 0    | 0    | 0    | 0     | 1     | 11 | 0    | 0     |
| <b>Losses</b>            | 18p     | 1   | 0    | 1    | 1    | 0    | 0    | 0    | 0    | 0     | 3     | 33 | 1    | 1     |
|                          | 18q     | 1   | 0    | 1    | 1    | 0    | 0    | 0    | 0    | 0     | 3     | 33 | 1    | 1     |
|                          | 8p      | 1   | 0    | 0    | 1    | 0    | 0    | 0    | 0    | 0     | 2     | 22 | 1    | 1     |
|                          | 21q     | 1   | 0    | 0    | 0    | 0    | 0    | 0    | 0    | 1     | 2     | 22 | 0    | 0     |
|                          | 22q     | 1   | 0    | 1    | 0    | 0    | 0    | 0    | 0    | 0     | 2     | 22 | 0    | 0     |
|                          | 13q     | 1   | 0    | 0    | 0    | 0    | 0    | 0    | 0    | 0     | 1     | 11 | 1    | 0     |
|                          | 20p     | 1   | 0    | 0    | 0    | 0    | 0    | 0    | 0    | 0     | 1     | 11 | 1    | 0     |
|                          | 4q      | 1   | 0    | 0    | 0    | 0    | 0    | 0    | 0    | 0     | 1     | 11 | 0    | 0     |
|                          | 9q      | 0   | 0    | 0    | 0    | 0    | 0    | 0    | 0    | 1     | 1     | 11 | 0    | 0     |
| <b>Allelic imbalance</b> | 22q     | 0   | 0    | 0    | 0    | 0    | 1    | 0    | 0    | 0     | 1     | 11 | 1    | 0     |
|                          | 1p      | 0   | 1    | 0    | 0    | 0    | 0    | 0    | 0    | 0     | 1     | 11 | 0    | 0     |
|                          | 3p      | 0   | 1    | 0    | 0    | 0    | 0    | 0    | 0    | 0     | 1     | 11 | 0    | 0     |
|                          | 4q      | 0   | 1    | 0    | 0    | 0    | 0    | 0    | 0    | 0     | 1     | 11 | 0    | 0     |
|                          | 9p      | 1   | 0    | 0    | 0    | 0    | 0    | 0    | 0    | 0     | 1     | 11 | 0    | 0     |
|                          | 9q      | 1   | 0    | 0    | 0    | 0    | 0    | 0    | 0    | 0     | 1     | 11 | 0    | 0     |
|                          | 15q     | 0   | 0    | 0    | 0    | 0    | 1    | 0    | 0    | 0     | 1     | 11 | 0    | 0     |
|                          | 18p     | 0   | 0    | 0    | 0    | 0    | 1    | 0    | 0    | 0     | 1     | 11 | 0    | 0     |
|                          | 18q     | 0   | 0    | 0    | 0    | 0    | 1    | 0    | 0    | 0     | 1     | 11 | 0    | 0     |
|                          | 21q     | 0   | 0    | 0    | 0    | 1    | 0    | 0    | 0    | 0     | 1     | 11 | 0    | 0     |

\* 93T is a tumoral sample from a different part of the same tumor as T92, and 337T is the relapse from the primary tumor 255T

Supplementary Table 10: Summary of the damaging mutations found by WES

| Chr.         | Sample        | Gene         | Position        | Ref. Allele | Alt. Allele | Mutation Profile             | AminoAcid Change | Cosmic HCC |
|--------------|---------------|--------------|-----------------|-------------|-------------|------------------------------|------------------|------------|
| chr1         | FLC100        | CSMD2        | 34068134        | C           | T           | NON_SYNONYMOUS_CODING        | G1055E           | 2.7        |
| chr1         | FLC100        | SASS6        | 100575999       | T           | G           | NON_SYNONYMOUS_CODING        | K210T            |            |
| chr2         | FLC100        | RTN4         | 55214684        | C           | G           | NON_SYNONYMOUS_CODING        | R1055T           |            |
| chr3         | FLC100        | COL6A6       | 130290045       | C           | A           | NON_SYNONYMOUS_CODING        | L929I            |            |
| chr4         | FLC100        | GABRA2       | 46252405        | G           | A           | NON_SYNONYMOUS_CODING        | P426S            | 1.4        |
| chr4         | FLC100        | UGT2B10      | 69879855        | T           | A           | NON_SYNONYMOUS_CODING        | Y201F            |            |
| chr7         | FLC100        | WIP1         | 5256247         | G           | A           | NON_SYNONYMOUS_CODING        | M127I            |            |
| chr7         | FLC100        | CDK13        | 40133813        | A           | G           | NON_SYNONYMOUS_CODING        | D1198G           |            |
| chr9         | FLC100        | CD72         | 35618023        | C           | A           | NON_SYNONYMOUS_CODING        | G60W             | 1.4        |
| chr10        | FLC100        | TUBB8        | 94579           | A           | G           | NON_SYNONYMOUS_CODING        | F13L             | 1.4        |
| chr10        | FLC100        | JMJD1C       | 64936109        | A           | C           | NON_SYNONYMOUS_CODING        | L2213R           | 1.4        |
| chr10        | FLC100        | MMS19        | 99229890        | G           | A           | NON_SYNONYMOUS_CODING        | T238I            | 1.4        |
| <b>chr13</b> | <b>FLC100</b> | <b>BRCA2</b> | <b>32944573</b> | <b>A</b>    | <b>G</b>    | <b>NON_SYNONYMOUS_CODING</b> | <b>Y2789C</b>    | <b>1.5</b> |
| chr14        | FLC100        | RNASE7       | 21511552        | G           | C           | NON_SYNONYMOUS_CODING        | C134S            |            |
| chr14        | FLC100        | ACIN1        | 23564195        | G           | A           | NON_SYNONYMOUS_CODING        | R101W            | 1.4        |
| chr16        | FLC100        | POLR3K       | 97543           | A           | G           | NON_SYNONYMOUS_CODING        | C72R             |            |
| chr16        | FLC100        | ITGAM        | 31308917        | C           | T           | NON_SYNONYMOUS_CODING        | P480L            | 1.4        |
| chr16        | FLC100        | HAS3         | 69148458        | C           | G           | NON_SYNONYMOUS_CODING        | D317E            |            |
| chr18        | FLC100        | IMPA2        | 12028977        | G           | A           | NON_SYNONYMOUS_CODING        | V246M            |            |
| chr18        | FLC100        | ZNF236       | 74583728        | G           | T           | NON_SYNONYMOUS_CODING        | G203V            |            |
| chr19        | FLC100        | CRX          | 48364098        | C           | T           | NON_SYNONYMOUS_CODING        | R104W            | 1.4        |
| chr20        | FLC100        | PRND         | 4705610         | A           | C           | NON_SYNONYMOUS_CODING        | E138A            |            |
| chr20        | FLC100        | ADNP         | 49518604        | T           | C           | NON_SYNONYMOUS_CODING        | T51A             |            |
| chrX         | FLC100        | ARMCX1       | 100808651       | G           | T           | NON_SYNONYMOUS_CODING        | L246F            | 1.4        |

**Supplementary Table 1.** Clinicopathological characteristics of 72 FLC patients in the training and validation cohorts

| Variable               | Training<br>(n=38) | Validation-<br>French (n=22) | Validation-<br>Brazilian (n=12) | p-value     |
|------------------------|--------------------|------------------------------|---------------------------------|-------------|
| Origin                 |                    |                              |                                 |             |
| USA                    | 19 (50%)           | 0                            | 0                               |             |
| Europe                 | 19 (50%)           | 22 (100%)                    | 0                               |             |
| South-America          |                    | 0                            | 12 (100%)                       |             |
| Median age             | 25.5 (11-65)       | 26 (17-65)                   | 21 (17-33)                      | 0.26        |
| Gender                 |                    |                              |                                 | 0.51        |
| Male                   | 16 (42%)           | 6 (28%)                      | 4 (33%)                         |             |
| Female                 | 22 (58%)           | 16 (72%)                     | 8 (67%)                         |             |
| Race                   |                    |                              |                                 | 0.24        |
| Caucasian              | 23 (61%)           |                              | 11 (92%)                        |             |
| Non-caucasian          | 8 (21%)            |                              | 1 (8%)                          |             |
| Virology               |                    |                              |                                 | -           |
| HCV                    | 1 (3%)             |                              | 0                               |             |
| HBV                    | 1 (3%)             |                              | 0                               |             |
| Fibrosis               |                    |                              |                                 | 0.06        |
| F0                     | 27 (71%)           | 21 (95%)                     | 12 (100%)                       |             |
| F1-2                   | 8 (21%)            | 1 (5%)                       | 0                               |             |
| Cirrhosis              | 1 (3%)             | 1 (5%)                       | 0                               | 1.00        |
| Median tumor size (cm) | 11 (7-13)          | 9 (2.5-17)                   | 13 (6-20)                       | <b>0.03</b> |

|                         |          |           |           |      |
|-------------------------|----------|-----------|-----------|------|
| Multiple nodules        |          |           |           | 0.66 |
| Absent                  | 27 (69%) |           | 11 (92%)  |      |
| Present                 | 7 (18%)  |           | 1 (8%)    |      |
| Satellites              | 6 (16%)  |           | 2 (17%)   | 1.00 |
| Macro-vascular invasion | 5 (13%)  |           |           | -    |
| Treatment               |          |           |           | 0.28 |
| Resection               | 34 (89%) | 22 (100%) | 12 (100%) |      |
| Transplantation         | 4 (11%)  | 0         | 0         |      |
| Adjuvant Therapy        | 14 (37%) |           | 0         | 1.00 |
| Chemotherapy            | 11 (29%) |           |           | -    |
| Radiotherapy            | 2 (5%)   |           |           | -    |
| Chemoembolization       | 1 (3%)   |           |           | -    |
| Events                  |          |           |           |      |
| Recurrence              | 21 (54%) |           | 7 (58%)   | 1.00 |
| Death                   | 16 (42%) | 9 (41%)   | 7 (58%)   | 0.65 |
| Median survival (month) | 58       | 68        | 48        | 0.37 |

Fisher's exact test for categorical data.

Anova test for parametric non-categorical data

**Supplementary Table 12.** Enrichment of selected gene signatures in 3 liver cancer cohorts (HCC, ICC and FLC) evaluated by NTP (FDR<0.05).

| Gene signatures                                       | Liver cancer cohorts |                   |                  |
|-------------------------------------------------------|----------------------|-------------------|------------------|
|                                                       | HCC<br>n=228, (%)    | ICC<br>n=149, (%) | FLC<br>n=35, (%) |
| FLC molecular subclasses                              |                      |                   |                  |
| FLC_Proliferation                                     | 54,(24)              | 73,(49)           | 18,(51)          |
| FLC_Inflammation                                      | 8,(4)                | 43,(29)           | 8,(23)           |
| Tumor aggressiveness/ poor-prognosis                  |                      |                   |                  |
| Solid tumors                                          |                      |                   |                  |
| Breast, Sarrio_EMT <sup>36</sup>                      | 55,(24)*             | 21,(14)*          | 0,(0)            |
| Thyroid, Montero_poor prognosis <sup>37</sup>         | 37,(16)*             | 11,(7)            | 0,(0)            |
| Melanoma, Winnepenninckx_poor prognosis <sup>38</sup> | 59,(26)*             | 32,(21)*          | 0,(0)            |
| HCC                                                   |                      |                   |                  |
| Coulouarn_TGFb <sup>39</sup>                          | 32,(14)              | 28,(19)*          | 1,(3)            |
| Boyault_G3 poor prognosis <sup>16</sup>               | 53,(23)*             | 4,(3)             | 3,(9)            |

\* significant (p&lt;0.05) vs FLC tumors
